# Supplementary material for: A suitably fabricated ternary nanocomposite (Cu-CuO@rGO-SiO2) as a sustainable and common heterogeneous catalyst for C–S, C–O and C–N coupling reactions
Source: Royal Society of Chemistry journal article supplement (doi:10.1039/d4nr01116c), 2024-01-01

## Electronic Supplementary Information

### **Suitably fabricated ternary nanocomposite (Cu-CuO@rGO-SiO<sub>2</sub>) as sustainable and common heterogeneous catalyst for C-S, C-O & C-N coupling reactions**

Prasun Choudhury,<sup>a</sup> Sujit Ghosh,<sup>b</sup> Kinkar Biswas\*<sup>a</sup> and Basudeb Basu\*<sup>c</sup>

<sup>a</sup>Department of Chemistry, University of North Bengal, Darjeeling 734013, India

<sup>b</sup>Raiganj Surendranath Mahavidyalaya, Raiganj, Uttar Dinajpur 733134, India

<sup>c</sup>Formerly Department of Chemistry, University of North Bengal, Darjeeling 734013, India

## Table of contents

|            |                                                                                                                       |           |
|------------|-----------------------------------------------------------------------------------------------------------------------|-----------|
| <b>S1.</b> | <b>General information</b>                                                                                            | <b>3</b>  |
| <b>S2.</b> | <b>General procedure for the preparation of catalyst</b>                                                              | <b>3</b>  |
| <b>S3.</b> | <b>General procedure for cross-coupling reactions</b>                                                                 | <b>4</b>  |
| <b>S4.</b> | <b>Characterization of the catalyst after the reaction</b>                                                            | <b>5</b>  |
| <b>S5.</b> | <b>Comparison of catalytic performances of various copper catalysts in C-S, C-N and C-O cross-coupling reactions</b>  | <b>8</b>  |
| <b>S6.</b> | <b>Characterization data of various cross-coupled products</b>                                                        | <b>10</b> |
| <b>S7.</b> | <b>References</b>                                                                                                     | <b>15</b> |
| <b>S8.</b> | <b>Copies of <math>^1\text{H}</math> and <math>^{13}\text{C}</math> NMR spectra of various cross-coupled products</b> | <b>17</b> |

## **S1. General information**

All reagents were purchased from Sigma Aldrich and used directly without further purification. Tetraethyl orthosilicate (TEOS) was procured from Sigma Aldrich and used as received. The solvents were purchased from commercial suppliers and used after distillation. All the products were purified by column chromatography on 60–120 mesh silica gel (SRL, India). For TLC, Merck plates coated with silica gel 60, F<sub>254</sub> were used. FT-IR spectra were recorded in FT-IR 8300 SHIMADZU spectrophotometer. The NMR spectra were recorded on Bruker Ascend 400 spectrometer (400 MHz for <sup>1</sup>H and 100 MHz for <sup>13</sup>C) and Bruker AV 300 spectrometer (300 MHz for <sup>1</sup>H and 75 MHz for <sup>13</sup>C) in CDCl<sub>3</sub>. Splitting patterns of protons were described as s (singlet), d (doublet), t (triplet), dd (doublet of doublet) and m (multiplet). Chemical shifts ( $\delta$ ) were reported in parts per million (ppm) relative to TMS as internal standard. *J* values (coupling constant) were reported in Hz (Hertz). <sup>13</sup>C NMR spectra were recorded with complete proton decoupling (CDCl<sub>3</sub>:  $\delta$  77.0 ppm). Centrifugation was done in REMI R-8C DX centrifuge. The X-ray diffraction studies (PXRD) were done by the Rigaku SmartLab (9 kW) diffractometer using CuK $\alpha$  radiation. Raman spectra of the samples were obtained with Renishaw InVia micro Raman spectroscopy with 514 nm laser source. Scanning Electron Microscopy (SEM) and Electron Dispersive X-ray Spectroscopy (EDS) were performed using JEOL JSM-IT 100 electron microscope. Transmission electron microscopy (TEM) measurements were carried out using a JEOL JEM-2100F electron microscope. X-ray photoelectron spectroscopic (XPS) measurements were done on a PHI 5000 Versaprobe II XPS system with an Al K $\alpha$  source and a charge neutralizer at room temperature. BET surface areas and pore size were measured by determining the N<sub>2</sub> adsorption isotherms and using the Brunauer, Emmett, and Teller (BET) method with the Nova Touch LX2 gas sorption analyzer from Quantachrome Instruments. Copper content in the nanocomposite was measured by single quadrupole inductively coupled plasma mass spectrometry (ICP-MS) with Agilent ICP-MS (model: 7700) instrument.

## **S2. General procedure for the preparation of catalyst**

### **S2.I. Preparation of graphene oxide (GO)**

Graphene oxide (GO) was prepared according to the Tour's method.<sup>1</sup> In this method a 9:1 (v/v) mixture of H<sub>2</sub>SO<sub>4</sub> / H<sub>3</sub>PO<sub>4</sub> (180:20 mL) was added to a mixture of graphite powder (1.5 g) and KMnO<sub>4</sub> (9.0 g). The mixture was then stirred at 50 °C for 12 h. After cooling the mixture to room temperature, it was gradually poured into crushed ice (200 g), which was followed by the slow addition H<sub>2</sub>O<sub>2</sub> (30 %, 1.5 mL). The solution was then centrifuged (5000

rpm) and the supernatant was discarded. The residual solid material was successively washed with deionised water (100 mL) and then with 30% HCl (100 mL). The solid material was then repeatedly washed with water and centrifuged. Finally, the solid brown material was collected and dried at 60 °C under vacuum to obtain solid graphene oxide.

### **S2.II. Preparation of GO-SiO<sub>2</sub> hybrid nanocomposite**

GO-SiO<sub>2</sub> hybrid nanocomposite was prepared by following a previously reported method.<sup>2</sup> For this purpose, the well-known hydrolysis of tetraethyl orthosilicate (TEOS) was employed. Initially graphene oxide (300 mg) prepared and TEOS (5.0 g) were dispersed separately in ethanol (30.0 g). The two suspensions were then mixed together and placed into a preheated oil bath at 40 °C for 10 minutes. This was followed by the addition of hydrous ammonia (NH<sub>3</sub>·H<sub>2</sub>O, 0.76 g) into the suspension of GO and TEOS. The entire contents were stirred for 15 h at 40 °C before cooling to room temperature. The solid material was filtered and washed of de-ionized water (3 x 20 mL) and ethanol (3 x 20 mL), and finally dried under vacuum at 60 °C for 48 h.

### **S2.III. Preparation of Cu-CuO@rGO-SiO<sub>2</sub> nanocomposite**

GO-SiO<sub>2</sub> hybrid nanocomposite (1.0 g) was taken in a teflon-capped sealed tube. To it Cu(OAc)<sub>2</sub>·H<sub>2</sub>O (1.0 mmol, 200 mg) and NaBH<sub>4</sub> (5.26 mmol, 200 mg) was added followed by the addition of distilled water (5 mL). It was then placed in a pre-heated oil bath at 100 °C and gently stirred for 3 h. The mixture was then cooled to room temperature and centrifuged at 5000 rpm. The supernatant was discarded and the residue was washed with de-ionized water (3 x 20 mL) and finally with acetone (2 x 20 mL). The solid mass was then dried under vacuum for 48 h to obtain powdered Cu-CuO@rGO-SiO<sub>2</sub> nanocomposite. This nanocomposite was used for all cross-coupling reactions.

## **S3. General procedure for cross-coupling reactions**

### **S3.I. C–S cross-coupling reaction**

A teflon-capped sealed tube equipped with a small magnetic stir bar, aryl halides (1.0 mmol), thiols (1.0 mmol), Cu-CuO@rGO-SiO<sub>2</sub> (25 mg), K<sub>2</sub>CO<sub>3</sub> (2.0 mmol), TBAB (10 mol%) and H<sub>2</sub>O (2 mL) were added. The resulting reaction mixture was stirred at 90 °C for 8 h. After completion of the reaction (monitored by TLC), the reaction mixture was cooled to room temperature. The catalyst was then recovered through simple filtration. The reaction mixture was diluted with water and extracted with ethyl acetate (3 x 5 mL). Finally, the combined organic layer was dried over anhydrous Na<sub>2</sub>SO<sub>4</sub> and concentrated under reduced pressure.

The residue obtained was then purified by column chromatography on silica gel using the light petroleum ether and ethyl acetate as eluent to afford the desired thioethers (**3a-3i**). All the products were characterized by  $^1\text{H}$  and  $^{13}\text{C}$  NMR spectroscopy.

### **S3.II. C–O cross-coupling reaction**

In a teflon-capped sealed tube equipped with a magnetic stir bar, aryl halides (1.0 mmol), phenols (1.0 mmol), Cu-CuO@rGO-SiO<sub>2</sub> (25 mg), K<sub>3</sub>PO<sub>4</sub> (2 mmol), 2,2'-bipyridine (10 mol%) and DMF (2 mL) were added. The resulting reaction mixture was stirred at 110 °C for 24 h. After completion of the reaction (monitored by TLC), the reaction mixture was cooled to room temperature and diluted with H<sub>2</sub>O. The catalyst was then recovered through simple filtration and the reaction mixture was extracted with ethyl acetate (3 x 5 mL). Finally, the combined organic layer was dried over anhydrous Na<sub>2</sub>SO<sub>4</sub> and concentrated under reduced pressure. The residue obtained was purified by column chromatography on silica gel using the light petroleum ether and ethyl acetate as eluent to afford the desired products (**5a-5f**). All the compounds were characterized by  $^1\text{H}$  and  $^{13}\text{C}$  NMR spectroscopy.

### **S3.III. C–N cross-coupling reaction**

A teflon-capped sealed tube equipped with a magnetic stir bar, aryl halides (1.0 mmol), imidazoles (1.0 mmol), Cu-CuO@rGO-SiO<sub>2</sub> (25 mg), KOH (2 mmol) and MeCN (2 mL) were added. The resulting reaction mixture was placed in an oil bath and stirred at 80 °C for 24 h. After completion of the reaction (monitored by TLC), the reaction mixture was cooled to room temperature. The catalyst was then recovered through simple filtration. The reaction mixture was diluted with water and extracted by ethyl acetate (3 x 5 mL). Finally, the combined organic layer was dried over anhydrous Na<sub>2</sub>SO<sub>4</sub> and concentrated under reduced pressure. The residue obtained was purified by column chromatography on silica gel using the light petroleum ether and ethyl acetate as eluent to afford the desired products (**7a-7i**). All the products were characterized by  $^1\text{H}$  and  $^{13}\text{C}$  NMR spectroscopy.

#### S4. Characterization of the catalyst after the reaction

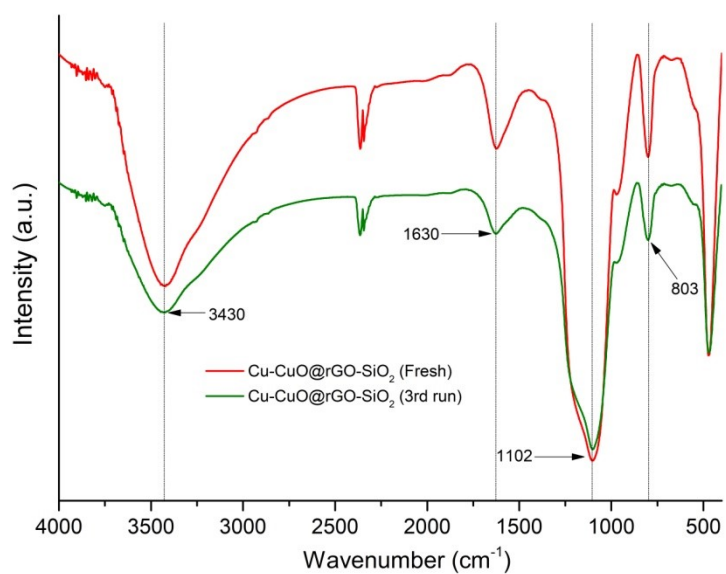

**Figure S4.I.** FT-IR spectra of the catalyst; fresh and after the third run

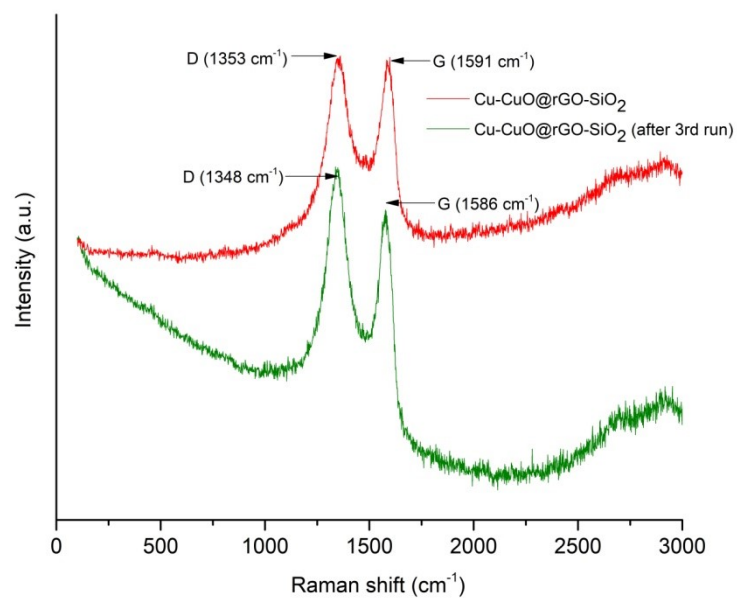

**Figure S4.II.** Raman spectra of the catalyst; fresh and after the third run

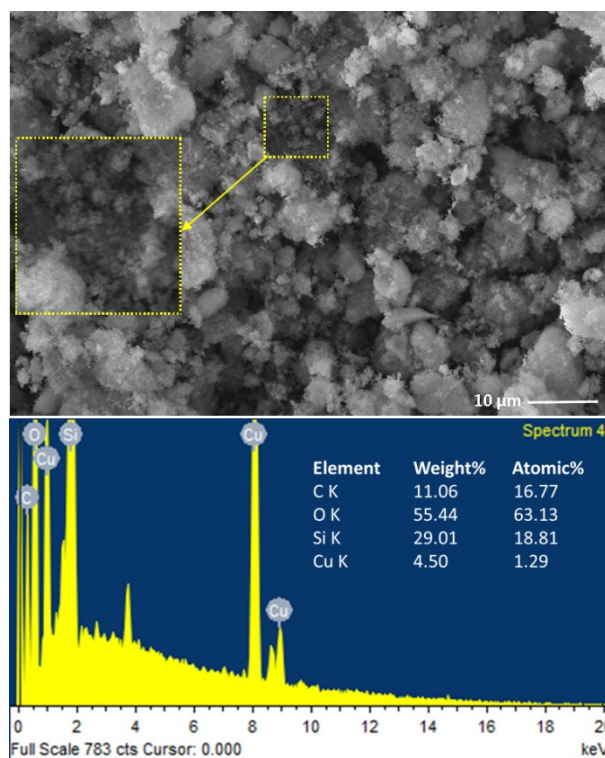

**Figure S4.III.** SEM and SEM-EDS image of the catalyst after the third run

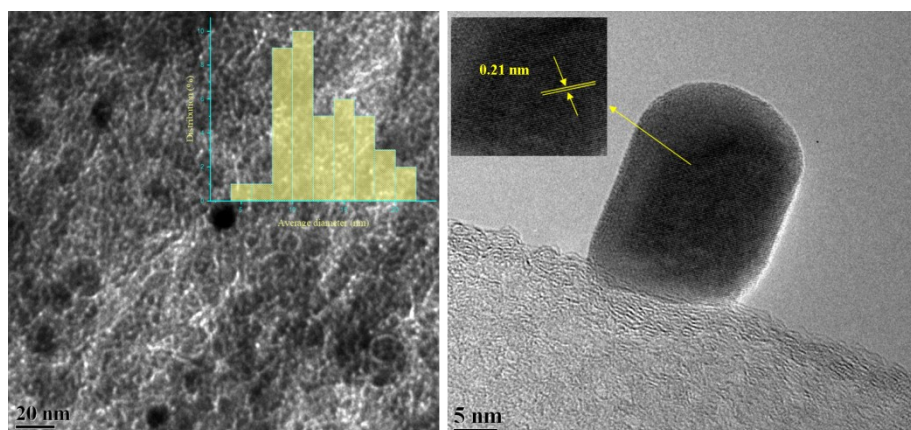

**Figure S4.IV.** HRTEM images of the catalyst after the third run

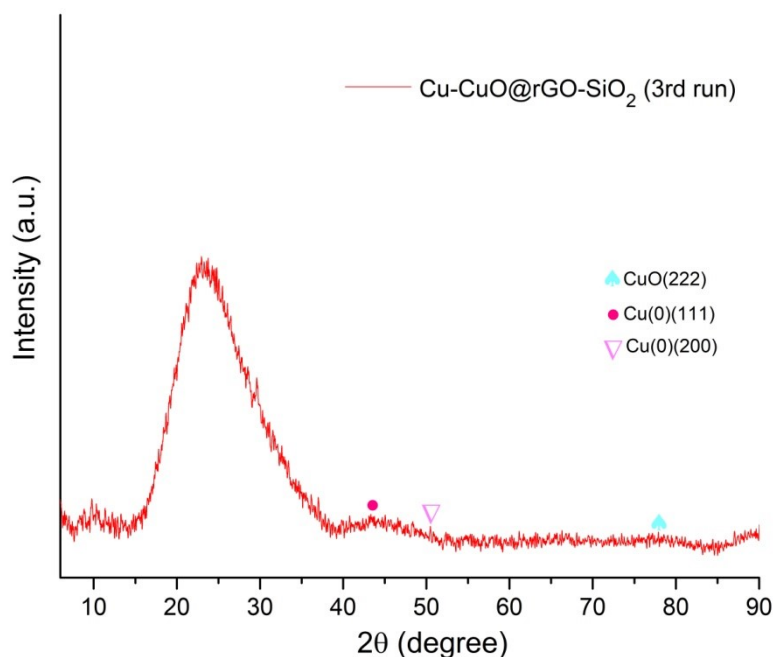

**Figure S4.V.** PXRD of the catalyst after the third run

**S5.** Comparison of catalytic performances of various copper catalysts in C–S, C–N and C–O cross-coupling reactions

| Entry | Catalyst                                                      | Reaction conditions                                                                                                                                                                                                                                                                                  | Yield (%)                                      | References |
|-------|---------------------------------------------------------------|------------------------------------------------------------------------------------------------------------------------------------------------------------------------------------------------------------------------------------------------------------------------------------------------------|------------------------------------------------|------------|
| 1     | Dual Responsive Sustainable Cu <sub>2</sub> O/Cu Nanocatalyst | <b>Chan-Lam Cross-Coupling:</b><br>Phenylboronic acid, imidazole, Cu-463K (20 wt%), MeOH, 60 °C, 7 h.                                                                                                                                                                                                | 41-90                                          | 3          |
| 2     | GO–PN–CuO                                                     | <b>C–O Coupling reaction:</b><br>4-bromobenzaldehyde, ArOH, catalyst (20 mg), 110 °C, 12 h.                                                                                                                                                                                                          | 10-94                                          | 4          |
| 3     | DS/GO                                                         | <b>C–S cross coupling reaction:</b><br>Iodobenzene, 3,5-dimethylthio phenol, catalyst (25 mg), Cs <sub>2</sub> CO <sub>3</sub> , DMSO, 110 °C, 4 h.<br><b>C–N cross coupling reaction:</b><br>Iodobenzene, methylamine, catalyst (25 mg), Cs <sub>2</sub> CO <sub>3</sub> , DMF/water, 110 °C, 24 h. | >90<br>(conversion)<br><br>>90<br>(conversion) | 5          |
| 4     | Cu–Cu <sub>2</sub> O/C and CuO–Cu <sub>2</sub> O/C catalysts  | <b>C–N cross coupling reactions:</b><br>Iodobenzene, imidazole, KOH, catalyst (15 mg), DMSO, 80 °C, 24 h.                                                                                                                                                                                            | 40.1-96.2                                      | 6          |
| 5     | CuONPs                                                        | <b>For C–N coupling reaction:</b>                                                                                                                                                                                                                                                                    | 25-90                                          | 7          |



|   |                             |                                                                                                                                                                                                                                                                                                                                                                                                                         |                                 |                  |
|---|-----------------------------|-------------------------------------------------------------------------------------------------------------------------------------------------------------------------------------------------------------------------------------------------------------------------------------------------------------------------------------------------------------------------------------------------------------------------|---------------------------------|------------------|
|   |                             | Benzamide, iodobenzene, K <sub>2</sub> CO <sub>3</sub> , CuONPs (6 mg), DMF, 110-120 °C, 12 h.                                                                                                                                                                                                                                                                                                                          |                                 |                  |
| 6 | CuO NPs                     | <b>C-S cross coupling reaction:</b><br>RSH, ArI, base, [CuSPh] <sub>n</sub> (1 mol%), DMSO, 110 °C, 21 h, Ar atmosphere.                                                                                                                                                                                                                                                                                                | 57-98                           | 8                |
| 7 | Cu-Fe hydrotalcite          | <b>C-S cross coupling reaction:</b><br>Aryl halide, thiol, catalyst (30 mg), K <sub>2</sub> CO <sub>3</sub> , DMF, 120 °C.                                                                                                                                                                                                                                                                                              | 25-90                           | 9                |
| 8 | CuO on mesoporous silica    | <b>C-S cross coupling reaction:</b><br>Aryl iodide, alkyl thiol, catalyst (1 mol%), Cs <sub>2</sub> CO <sub>3</sub> , DMSO, 110 °C, 21 h.                                                                                                                                                                                                                                                                               | 66-96                           | 10               |
| 9 | Cu-CuO@rGO-SiO <sub>2</sub> | <b>C-S cross coupling reaction:</b><br>Iodobenzene, thiophenol, catalyst (25 mg), K <sub>2</sub> CO <sub>3</sub> , water, TBAB (10 mol%), 90 °C, 8 h.<br><b>C-O cross coupling reaction:</b><br>Iodobenzene, phenol, catalyst (25 mg), K <sub>3</sub> PO <sub>4</sub> , 2,2'-bipyridine, DMF, 110 °C, 24 h.<br><b>C-N cross coupling reaction:</b><br>Iodobenzene, imidazole, catalyst (25 mg), KOH, MeCN, 80 °C, 24 h. | 80-93<br><br>79-93<br><br>81-89 | <b>This work</b> |

## S6. Characterization data for various cross-coupled products

### (4-Methoxyphenyl)(phenyl)sulfane (3a)<sup>11</sup>

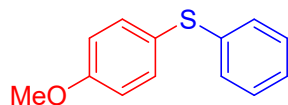

<sup>1</sup>H NMR (400 MHz, CDCl<sub>3</sub>): δ 3.85 (s, 3H), 6.94 (dd, *J* = 4, 12 Hz, 2H), 7.15-7.22 (m, 3H), 7.25-7.29 (m, 2H), 7.45 (dd, *J* = 4, 8 Hz, 2H); <sup>13</sup>C NMR (100 MHz, CDCl<sub>3</sub>): δ 55.3, 114.9, 124.2, 125.7, 128.1, 128.8, 135.3, 138.5, 159.7.

### (3-Methoxyphenyl)(phenyl)sulfane (3b)<sup>11</sup>

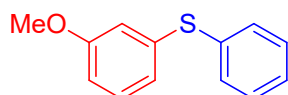

<sup>1</sup>H NMR (400 MHz, CDCl<sub>3</sub>): δ 3.76 (s, 3H), 6.77-6.80 (m, 1H), 6.87-6.88 (m, 1H), 6.90-6.93 (m, 1H), 7.21 (t, *J* = 8 Hz, 1H), 7.26-7.28 (m, 1H), 7.30-7.34 (m, 2H), 7.36-7.39 (m, 2H); <sup>13</sup>C NMR (100 MHz, CDCl<sub>3</sub>): δ 55.2, 112.7, 115.8, 122.9, 127.2, 129.2, 129.9, 131.4, 135.2, 137.2, 160.0.

### (2-Methoxyphenyl)(*p*-tolyl)sulfane (3c)<sup>12</sup>

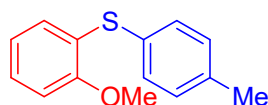

<sup>1</sup>H NMR (400 MHz, CDCl<sub>3</sub>): δ 2.36 (s, 1H), 3.89 (s, 1H), 6.81-6.85 (m, 1H), 6.87-6.89 (m, 1H), 6.93 (dd, *J* = 8, 2 Hz, 1H), 7.14-7.19 (m, 3H), 7.31-7.33 (m, 2H); <sup>13</sup>C NMR (100 MHz, CDCl<sub>3</sub>): δ 21.1, 55.8, 110.6, 121.1, 125.6, 127.3, 129.8, 130.0, 132.9, 137.7, 156.5.

### (3-Chlorophenyl)(2-methoxyphenyl)sulfane (3d)

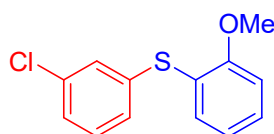

<sup>1</sup>H NMR (400 MHz, CDCl<sub>3</sub>): δ 3.85 (s, 3H), 6.91-6.95 (m, 2H), 7.12-7.19 (m, 3H), 7.21-7.22 (m, 1H), 7.25-7.27 (m, 1H), 7.30-7.35 (m, 1H); <sup>13</sup>C NMR (100 MHz, CDCl<sub>3</sub>): δ 55.9, 111.2, 121.3, 121.6, 126.5, 127.7, 129.2, 129.7, 129.9, 133.7, 134.7, 137.9, 158.2.

### (4-Fluorophenyl)(4-methoxyphenyl)sulfane (3e)<sup>13</sup>

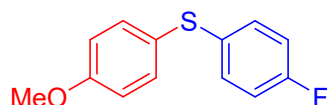

<sup>1</sup>H NMR (400 MHz, CDCl<sub>3</sub>): δ 3.81 (s, 3H), 6.86-6.90 (m, 2H), 6.93-6.97 (m, 2H), 7.18-7.22 (m, 2H), 7.34-7.38 (m, 2H); <sup>13</sup>C NMR (100 MHz, CDCl<sub>3</sub>): δ 55.3, 114.9, 116.0 (d, *J* = 22 Hz), 125.2, 131.0 (d, *J* = 8 Hz), 133.1 (d, *J* = 4 Hz), 134.4, 159.6, 160.3, 162.8.

**(4-Nitrophenyl)(*p*-tolyl)sulfane (3f)**<sup>13</sup>

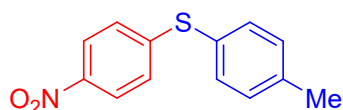

<sup>1</sup>H NMR (300 MHz, CDCl<sub>3</sub>): δ 2.44 (s, 1H), 7.16 (s, 2H), 7.30 (s, 2H), 7.45 (s, 2H), 8.06 (s, 2H); <sup>13</sup>C NMR (75 MHz, CDCl<sub>3</sub>): δ 21.2, 123.9, 126.2, 126.6, 130.8, 134.9, 140.1, 145.2, 149.2.

**(3-Nitrophenyl)(phenyl)sulfane (3g)**<sup>11</sup>

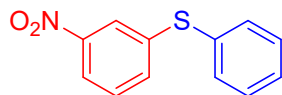

<sup>1</sup>H NMR (400 MHz, CDCl<sub>3</sub>): δ 7.39-7.43 (m, 4H), 7.47-7.51 (m, 3H), 7.98-8.01 (m, 1H), 8.03 (t, *J* = 2.4 Hz, 1H); <sup>13</sup>C NMR (100 MHz, CDCl<sub>3</sub>): δ 120.9, 123.1, 128.9, 129.6, 129.8, 132.1, 133.4, 134.2, 140.5, 148.7.

**1-(4-(Phenylthio)phenyl)ethanone (3h)**<sup>11</sup>

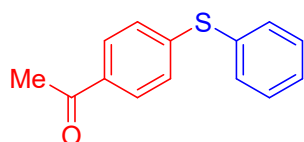

<sup>1</sup>H NMR (400 MHz, CDCl<sub>3</sub>): δ 2.53 (s, 3H), 7.18-7.21 (m, 2H), 7.37-7.40 (m, 3H), 7.47-7.49 (m, 2H), 7.78-7.82 (m, 2H); <sup>13</sup>C NMR (100 MHz, CDCl<sub>3</sub>): δ 26.3, 127.3, 128.6, 128.7, 129.5, 131.9, 133.7, 134.3, 144.7, 196.9.

**(4-Methoxyphenyl)(pentyl)sulfane (3i)**<sup>14</sup>

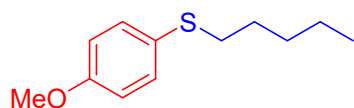

<sup>1</sup>H NMR (400 MHz, CDCl<sub>3</sub>): δ 0.87 (t, *J* = 8 Hz, 3H), 1.25-1.41 (m, 6H), 1.58 (t, *J* = 8 Hz, 2H), 3.79 (s, 3H), 6.83 (dd, *J* = 8.4, 2.2 Hz, 2H), 7.32 (dd, *J* = 8.8, 2.4 Hz, 2H); <sup>13</sup>C NMR (100 MHz, CDCl<sub>3</sub>): δ 13.9, 22.2, 29.0, 30.8, 35.7, 55.3, 114.4, 126.9, 132.9, 158.7.

**1-Methoxy-4-(*p*-tolyl)oxy)benzene (5a)**<sup>15</sup>

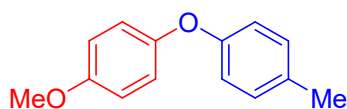

<sup>1</sup>H NMR (300 MHz, CDCl<sub>3</sub>): δ 2.30 (s, 3H), 3.77 (s, 3H), 6.79-6.86 (m, 4H), 6.88-6.97 (m, 2H), 7.02-7.11 (m, 2H); <sup>13</sup>C NMR (75 MHz, CDCl<sub>3</sub>): δ 20.6, 55.6, 114.8, 117.8, 120.3, 130.1, 132.0, 150.7, 155.6, 156.1.

**4,4'-Oxybis(methylbenzene) (5b)**<sup>15</sup>

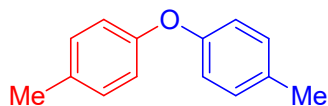

$^1\text{H NMR}$  (300 MHz,  $\text{CDCl}_3$ ):  $\delta$  2.32 (s, 6H), 6.88 (d,  $J = 8.1$  Hz, 4H), 7.11 (d,  $J = 7.8$  Hz, 4H);  $^{13}\text{C NMR}$  (75 MHz,  $\text{CDCl}_3$ ):  $\delta$  20.7, 118.6, 130.1, 132.4, 155.3.

#### 1-Nitro-3-(*p*-tolylloxy)benzene (5c)<sup>16</sup>

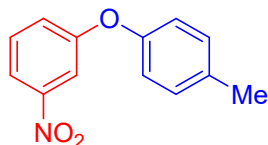

$^1\text{H NMR}$  (300 MHz,  $\text{CDCl}_3$ ):  $\delta$  2.35 (s, 3H), 6.94 (d,  $J = 8.4$  Hz, 2H), 7.19 (d,  $J = 8.3$  Hz, 2H), 7.28 (dd,  $J = 10.5, 2.4$  Hz, 1H), 7.43 (t,  $J = 8.2$  Hz, 1H), 7.73 (t,  $J = 2.2$  Hz, 1H), 7.85-7.89 (m, 1H);  $^{13}\text{C NMR}$  (75 MHz,  $\text{CDCl}_3$ ):  $\delta$  20.8, 112.2, 117.2, 119.9, 123.7, 130.2, 130.7, 134.6, 149.2, 153.0, 159.0.

#### 1-Methyl-2-(*p*-tolylloxy)benzene (5d)<sup>15</sup>

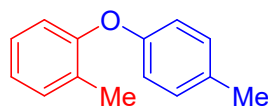

$^1\text{H NMR}$  (300 MHz,  $\text{CDCl}_3$ ):  $\delta$  2.24 (s, 3H), 2.30 (s, 3H), 6.79-6.87 (m, 3H), 7.00-7.15 (m, 4H), 7.21-7.24 (m, 1H);  $^{13}\text{C NMR}$  (75 MHz,  $\text{CDCl}_3$ ):  $\delta$  16.2, 20.6, 117.5, 119.2, 123.6, 127.0, 129.7, 130.1, 131.3, 131.9, 155.0, 155.5.

#### 1-(4-(*p*-Tolylloxy)phenyl)ethanone (5e)<sup>17</sup>

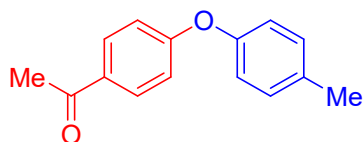

$^1\text{H NMR}$  (300 MHz,  $\text{CDCl}_3$ ):  $\delta$  2.36 (s, 3H), 2.56 (s, 3H), 6.94-6.99 (m, 4H),  $\delta$  7.18 (d,  $J = 8.1$  Hz, 2H), 7.90-7.94 (m, 2H);  $^{13}\text{C NMR}$  (75 MHz,  $\text{CDCl}_3$ ):  $\delta$  20.8, 26.4, 116.8, 120.2, 130.5, 130.6, 131.5, 134.4, 153.0, 162.5, 196.9.

#### 1-Chloro-4-(4-methoxyphenoxy)-2-methylbenzene (5f)

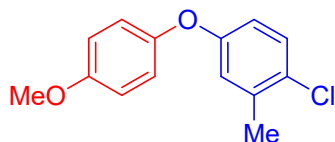

$^1\text{H NMR}$  (300 MHz,  $\text{CDCl}_3$ ):  $\delta$  2.30 (s, 3H), 3.79 (s, 3H), 6.70 (dd,  $J = 11.7, 2.8$  Hz, 1H), 6.81 (d,  $J = 2.8$  Hz, 1H), 6.85-6.89 (m, 2H), 6.92-6.96 (m, 2H), 7.22 (d,  $J = 8.6$  Hz, 1H),  $^{13}\text{C NMR}$  (75 MHz,  $\text{CDCl}_3$ ):  $\delta$  20.2, 55.6, 114.9, 116.2, 119.9, 120.7, 127.6, 129.8, 137.3, 149.9, 156.0, 157.0.

**1-(*p*-Tolyl)-1*H*-imidazole (7a)<sup>18</sup>**

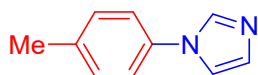

<sup>1</sup>H NMR (300 MHz, CDCl<sub>3</sub>): δ 2.39 (s, 3H), 7.18 (s, 1H), 7.23-7.28 (m, 5H), 7.81 (s, 1H);

<sup>13</sup>C NMR (75 MHz, CDCl<sub>3</sub>): δ 20.9, 118.3, 121.4, 130.1, 130.3, 134.9, 135.6, 137.4.

**1-Phenyl-1*H*-imidazole (7b)<sup>18</sup>**

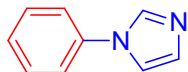

<sup>1</sup>H NMR (300 MHz, CDCl<sub>3</sub>): δ 7.24-7.28 (m, 2H), 7.35-7.40 (m, 3H), 7.46-7.51 (m, 2H), 7.90 (s, 1H); <sup>13</sup>C NMR (75 MHz, CDCl<sub>3</sub>): δ 118.7, 121.9, 127.7, 128.0, 130.1, 130.2, 133.9, 135.7.

**1-(*m*-Tolyl)-1*H*-imidazole (7c)<sup>19</sup>**

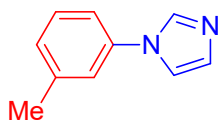

<sup>1</sup>H NMR (300 MHz, CDCl<sub>3</sub>): δ 2.32 (s, 3H), 6.92-7.38 (m, 5H), 7.85 (s, 1H); <sup>13</sup>C NMR (75 MHz, CDCl<sub>3</sub>): δ 21.3, 118.2, 118.5, 122.1, 128.2, 129.6, 130.2, 135.6, 137.3, 140.0.

**1-(3-Iodophenyl)-1*H*-imidazole (7d)<sup>20</sup>**

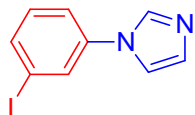

<sup>1</sup>H NMR (300 MHz, CDCl<sub>3</sub>): δ 7.07-7.12 (m, 2H), 7.16-7.17 (m, 1H), 7.26-7.28 (m, 1H), 7.57-7.65 (m, 2H), 7.75 (s, 1H); <sup>13</sup>C NMR (75 MHz, CDCl<sub>3</sub>): δ 94.7, 117.9, 120.5, 130.1, 130.7, 131.2, 135.4, 136.4, 138.2.

**1-(4-Methoxy-3-methylphenyl)-1*H*-imidazole (7e)**

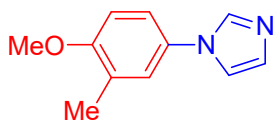

<sup>1</sup>H NMR (300 MHz, CDCl<sub>3</sub>): δ 2.26 (s, 3H), 3.87 (s, 3H), 6.85-6.89 (m, 1H), 7.14-7.18 (m, 4H), 7.78 (s, 1H); <sup>13</sup>C NMR (75 MHz, CDCl<sub>3</sub>): δ 16.3, 55.6, 110.2, 110.4, 120.2, 124.4, 125.6, 128.3, 129.7, 130.2, 157.1.

**1-(3-Nitrophenyl)-1*H*-imidazole (7f)<sup>21</sup>**

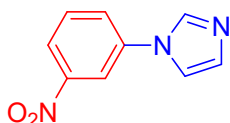

**<sup>1</sup>H NMR (300 MHz, CDCl<sub>3</sub>):** δ 7.28 (s, 1H), 7.40 (s, 1H), 7.70-7.81 (m, 2H), 7.99 (s, 1H), 8.23-8.26 (m, 1H), 8.30 (t, *J* = 2.1 Hz, 1 H); **<sup>13</sup>C NMR (75 MHz, CDCl<sub>3</sub>):** δ 116.2, 117.9, 122.0, 126.8, 131.1, 131.3, 135.4, 138.1, 149.0.

**2-(1*H*-imidazol-1-yl)pyridine (7g)<sup>21</sup>**

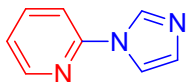

**<sup>1</sup>H NMR (400 MHz, CDCl<sub>3</sub>):** δ 7.15 (s, 1H), 7.17-7.21 (m, 1H), 7.31 (d, *J* = 12 Hz, 1H), 7.60 (t, *J* = 1.6 Hz, 1H), 7.75-7.79 (m, 1H), 8.32 (s, 1H), 8.41-8.43 (m, 1H); **<sup>13</sup>C NMR (100 MHz, CDCl<sub>3</sub>):** δ 112.2, 116.0, 121.9, 130.3, 134.8, 138.9, 149.0, 164.95.

**1-(*p*-Tolyl)-1*H*-benzo[*d*]imidazole (7h)<sup>22</sup>**

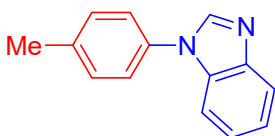

**<sup>1</sup>H NMR (300 MHz, CDCl<sub>3</sub>):** δ 2.44 (s, 3H), 7.30-7.40 (m, 6H), 7.48-7.52 (m, 1H), 7.84-7.88 (m, 1H), 8.09 (s, 1H); **<sup>13</sup>C NMR (75 MHz, CDCl<sub>3</sub>):** δ 21.1, 110.5, 120.4, 122.7, 123.6, 124.0, 130.6, 133.7, 138.1, 142.3, 143.7.

**1-(3-Nitrophenyl)-1*H*-benzo[*d*]imidazole (7i)<sup>22</sup>**

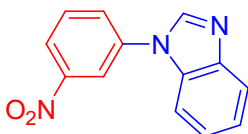

**<sup>1</sup>H NMR (300 MHz, CDCl<sub>3</sub>):** δ 7.37-7.42 (m, 2H), 7.55-7.58 (m, 1H), 7.77-7.83 (m, 1H), 7.88-7.94 (m, 2H), 8.1 (s, 1H), 8.31-8.34 (m, 2H); **<sup>13</sup>C NMR (75 MHz, CDCl<sub>3</sub>):** δ: 110.0, 118.7, 121.0, 122.5, 123.5, 124.5, 129.4, 131.2, 133.0, 137.4, 141.7, 144.1, 149.2.

## S7. References

1. Marcano, D. C.; Kosynkin, D. V.; Berlin, J. M.; Sinitskii, A.; Sun, Z.; Slesarev, A.; Alemany, L. B.; Lu, W.; Tour, J. M. Improved Synthesis of Graphene Oxide. *ACS Nano* **2010**, *4*, 4806-4814.
2. Zhang, W. L.; Choi, H. J. Silica-Graphene Oxide Hybrid Composite Particles and Their Electroresponsive Characteristics. *Langmuir* **2012**, *28*, 7055-7062.
3. M. Sarmah, D. Sarmah, A. Dewan, P. Bora, P. K. Boruah, M. R. Das, P. Bharali and U. Bora, *Catal. Lett.*, 2023, **153**, 1423-1437.
4. P. Oswal, A. Arora, S. Singh, D. Nautiyal, S. Kumar and A. Kumar, *New J. Chem.*, 2022, **46**, 3578-3587.
5. M. E. Shabestari, O. Martín, D. Díaz-García, S. Gómez-Ruiz, V. J. Gonzalez and J. Baselga, *Carbon*, 2020, **161**, 7-16.
6. A. K. Kar and R. Srivastava, *Inorg. Chem. Front.*, 2019, **6**, 576-589.
7. M. Halder, M. M. Islam, Z. Ansari, S. Ahammed, K. Sen and S. M. Islam, *ACS Sustainable Chem. Eng.*, 2017, **5**, 648-657.
8. Y. S. Panova, A. S. Kashin, M. G. Vorobev, E. S. Degtyareva and V. P. Ananikov, *ACS Catal.*, 2016, **6**, 3637-3643.
9. D. K. Dumbre, P. Selvakannan, S. Patil, V. R. Choudhary and S. K. Bhargava, *Appl. Catal. A: Gen.*, 2014, **476**, 54-60.
10. C.-K. Chen, Y.-W. Chen, C.-H. Lin, H.-P. Lin and C.-F. Lee, *Chem. Commun.*, 2010, **46**, 282-284.
11. Jiang, M.; Li, H.; Yang, H.; Fu, H. Room-Temperature Arylation of Thiols: Breakthrough with Aryl Chlorides. *Angew. Chem. Int. Ed.* **2017**, *56*, 874-879.
12. Kang, J.-C.; Li, Z.-H.; Chen, C.; Dong, L.-K.; Zhang, S.-Y. Paired Electrolysis Enabled Ni-Catalyzed Unconventional Cascade Reductive Thiolation Using Sulfonates. *J. Org. Chem.* **2021**, *86*, 15326-15334.
13. Wang, C.; Zhang, Z.; Tu, Y.; Li, Y.; Wu, J.; Zhao, J. Palladium-Catalyzed Oxidative Cross-Coupling of Arylhydrazines and Arenethiols with Molecular Oxygen as the Sole Oxidant. *J. Org. Chem.* **2018**, *83*, 2389-2394.
14. Mao, R.; Bera, S.; Turla, A. C.; Hu, X. Copper-Catalyzed Intermolecular Functionalization of Unactivated C(sp<sup>3</sup>)-H Bonds and Aliphatic Carboxylic Acids. *J. Am. Chem. Soc.* **2021**, *143*, 14667-14675.
15. Zhao, Y.; Wang, X.; Kodama, K.; Hirose, T. Copper-Catalyzed Coupling Reactions of Aryl Halides and Phenols by 4,4'-Dimethoxy-2,2'-bipyridine and 4,7-Dimethoxy-1,10-phenanthroline. *ChemistrySelect* **2018**, *3*, 12620-12624.

16. Maity, T.; Saha, D.; Das, S.; Bhunia, S.; Koner, S. Ligand free copper-catalyzed heterogeneous *O*-arylation reaction under green condition. *Catal. Commun.* **2015**, *58*, 141-148.
17. Sindhu, K. S.; Ujwaldev, S. M.; Krishnan, K. K.; Anilkumar, G. A green approach for arylation of phenols using iron catalysis in water under aerobic conditions. *J. Catal.* **2017**, *348*, 146-150.
18. Zhu, L.; Cheng, L.; Zhang, Y.; Xie, R.; You, J. Highly Efficient Copper-Catalyzed *N*-Arylation of Nitrogen-Containing Heterocycles with Aryl and Heteroaryl Halides. *J. Org. Chem.* **2007**, *72*, 2737-2743.
19. Das, S. K.; Deka, P.; Chetia, M.; Deka, R. C.; Bharali, P.; Bora, U. Spherical CuO Nanoparticles as Catalyst for Chan-Lam Cross-Coupling Reaction under Base Free Condition. *Catal. Lett.* **2018**, *148*, 547-554.
20. Alcalde, E.; Dinarès, I.; Rodríguez, S.; de Miguel, C. G. Synthetic Approaches to Sterically Hindered *N*-Arylimidazoles through Copper-Catalyzed Coupling Reactions. *Eur. J. Org. Chem.* **2005**, 1637-1643.
21. Zhang, H. Cai, Q.; Ma, D. Amino Acid Promoted CuI-Catalyzed C–N Bond Formation between Aryl Halides and Amines or *N*-Containing Heterocycles. *J. Org. Chem.* **2005**, *70*, 5164-5173.
22. Jia, X.; Peng, P. *N,O*-Bidentate ligand-tunable copper(II) complexes as a catalyst for Chan–Lam coupling reactions of arylboronic acids with *1H*-imidazole derivatives. *Org. Biomol. Chem.*, **2018**, *16*, 8984-8988.



## S8. Copies of $^1\text{H}$ and $^{13}\text{C}$ NMR spectra of various cross-coupled products

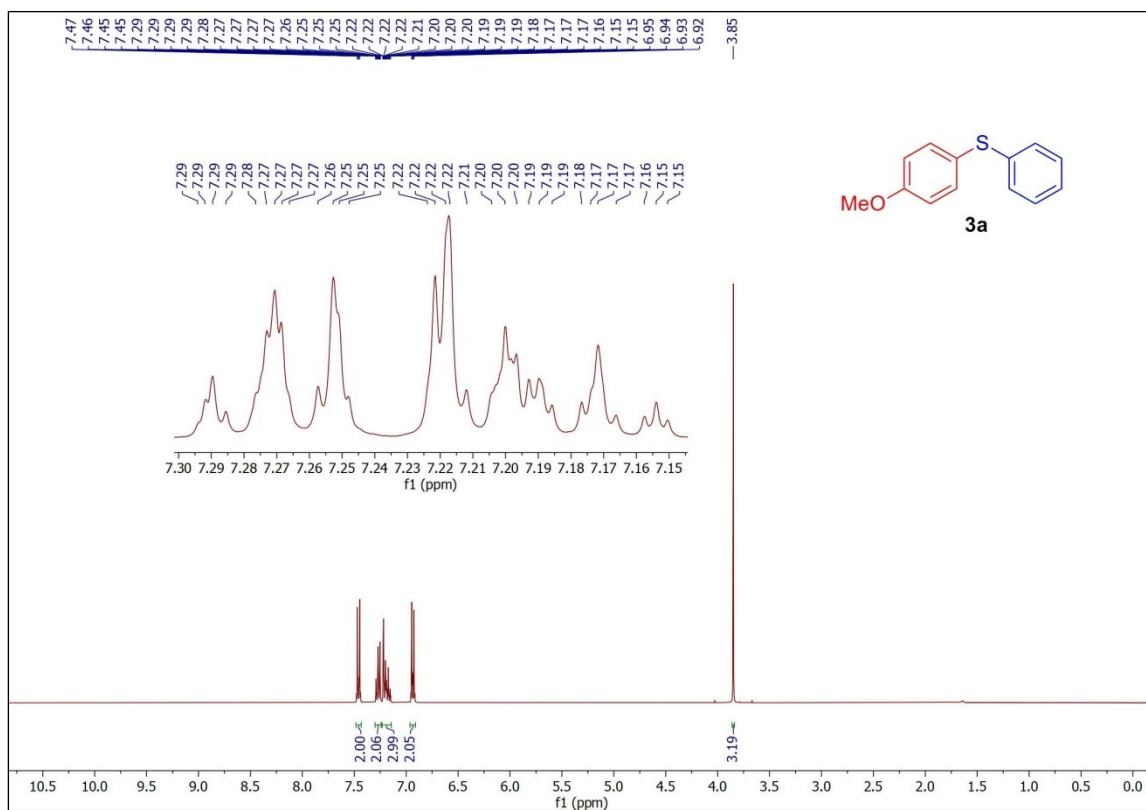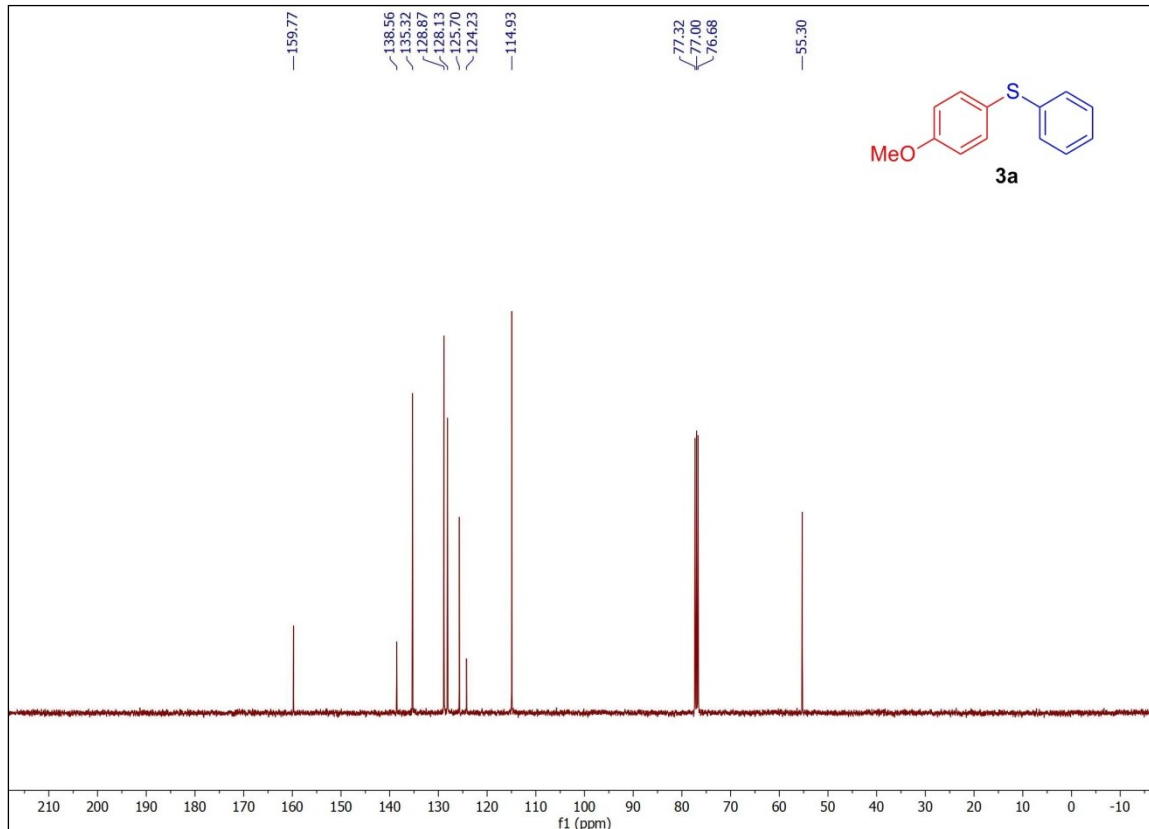

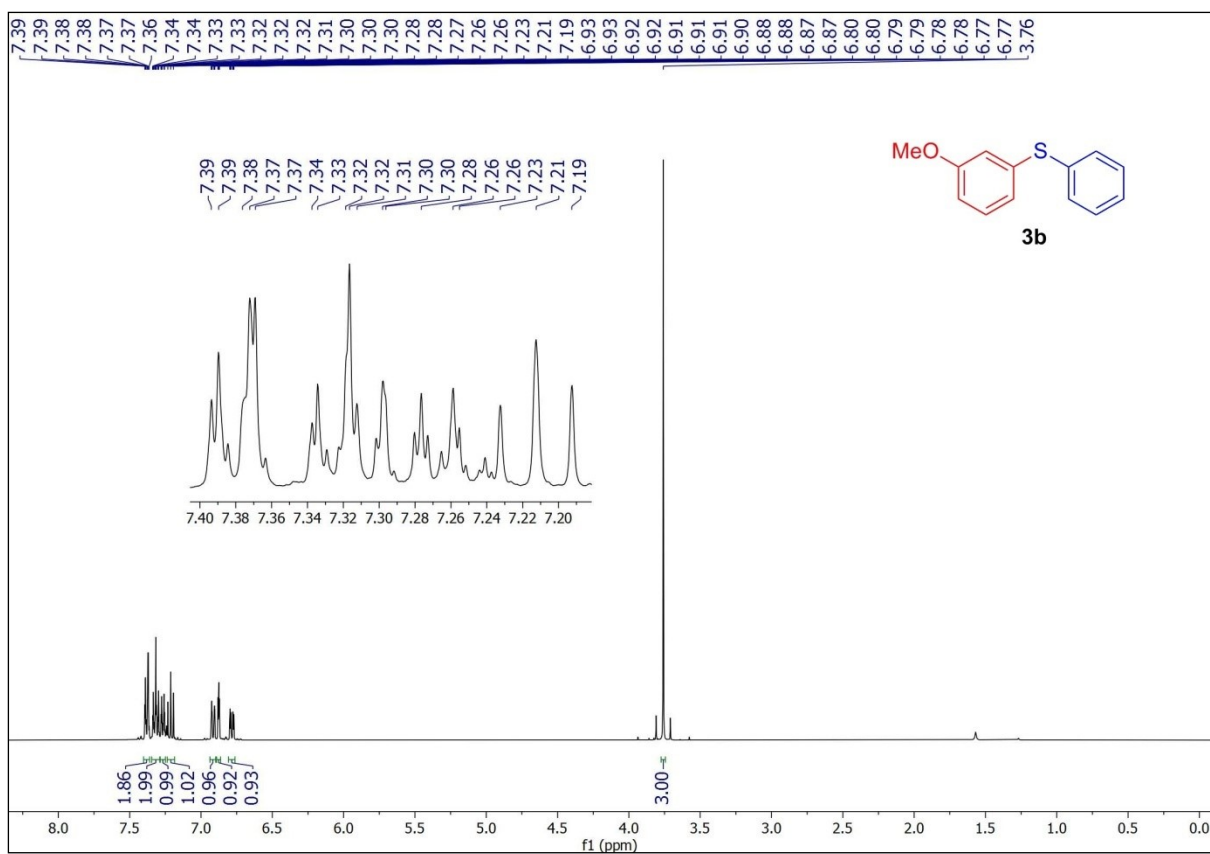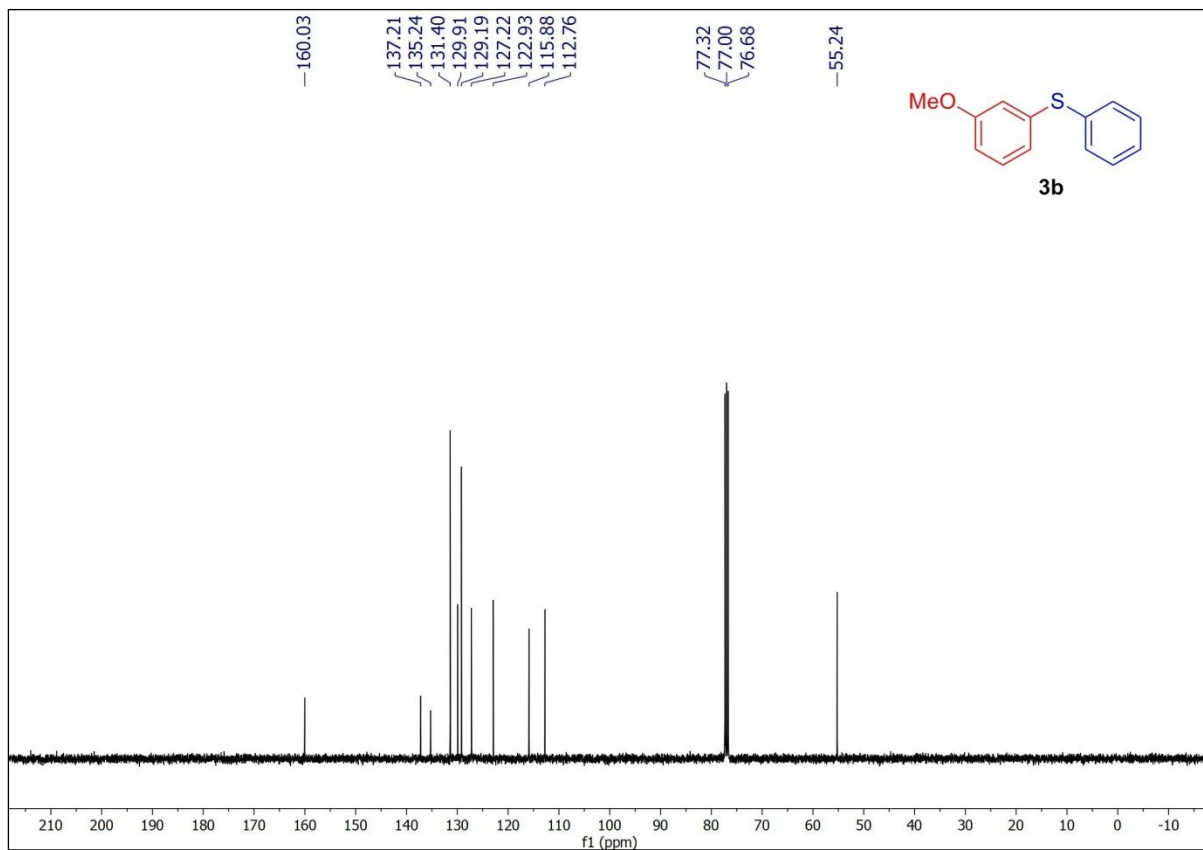

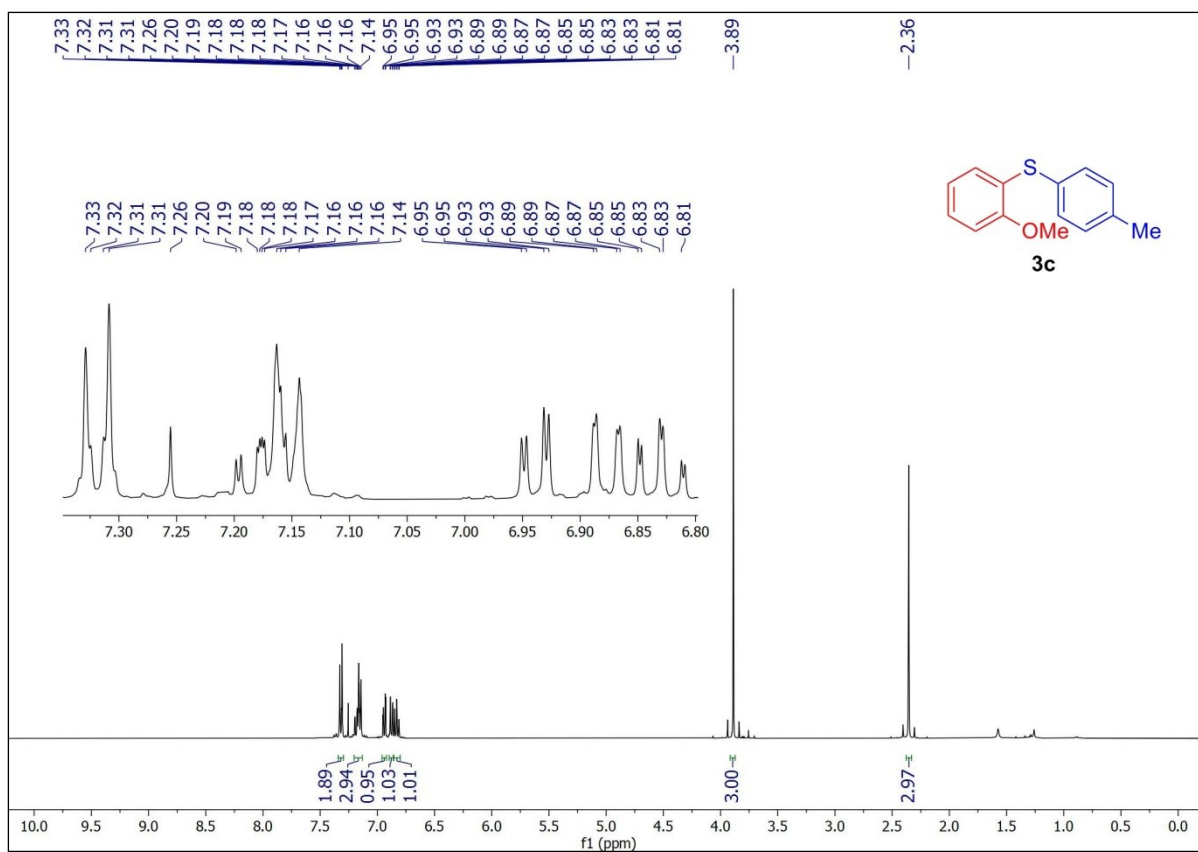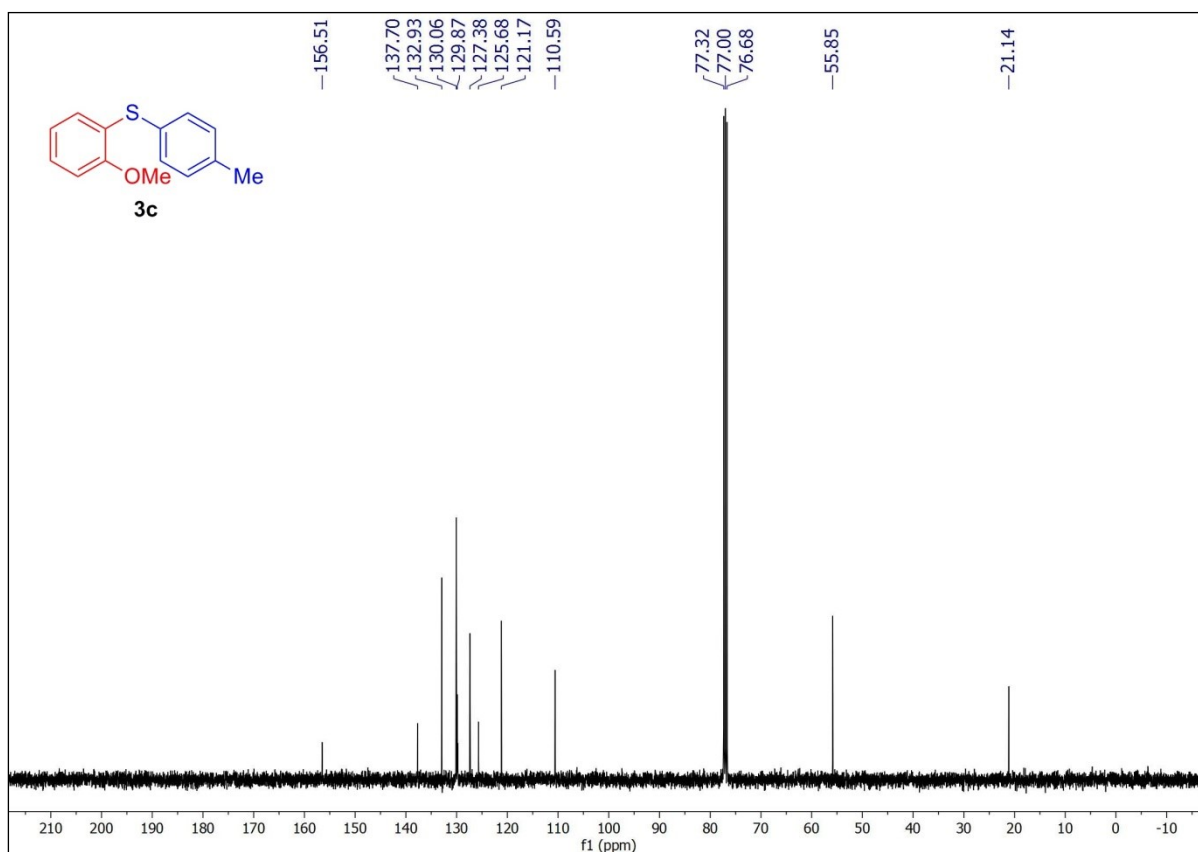

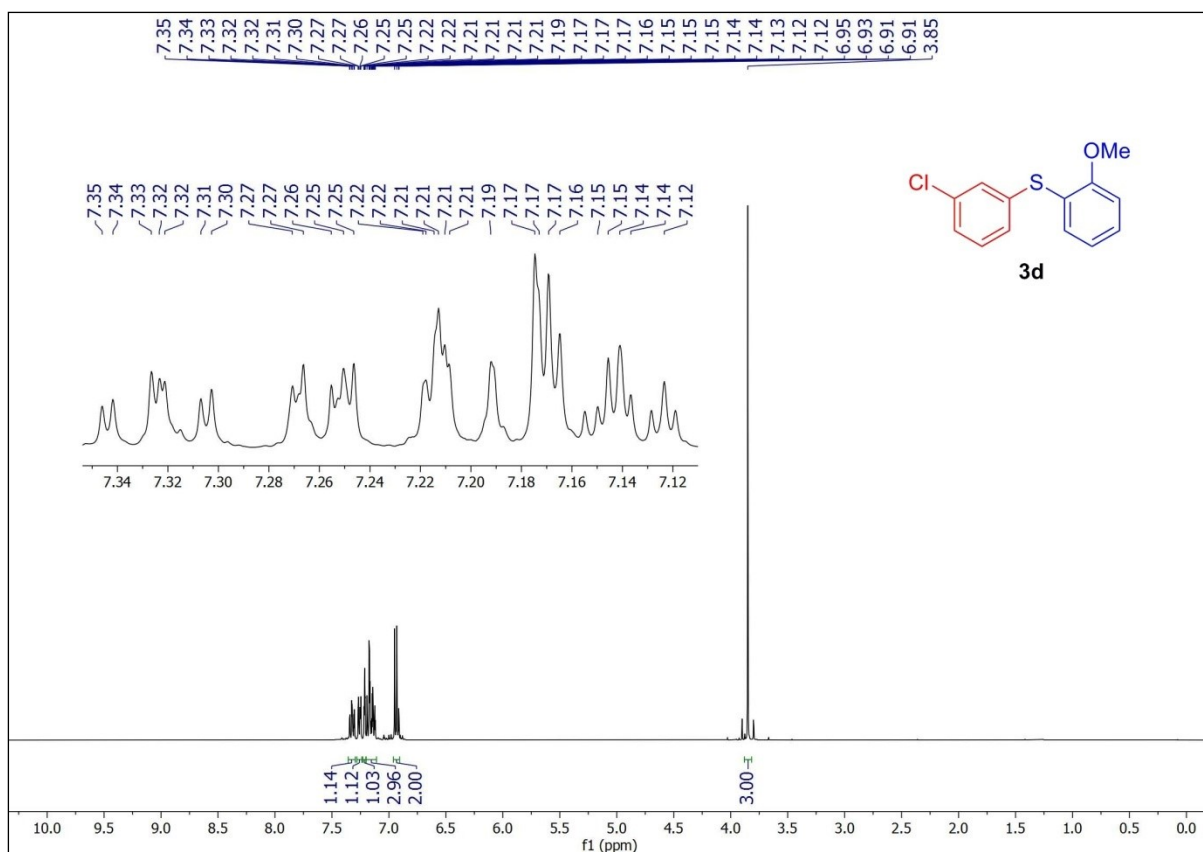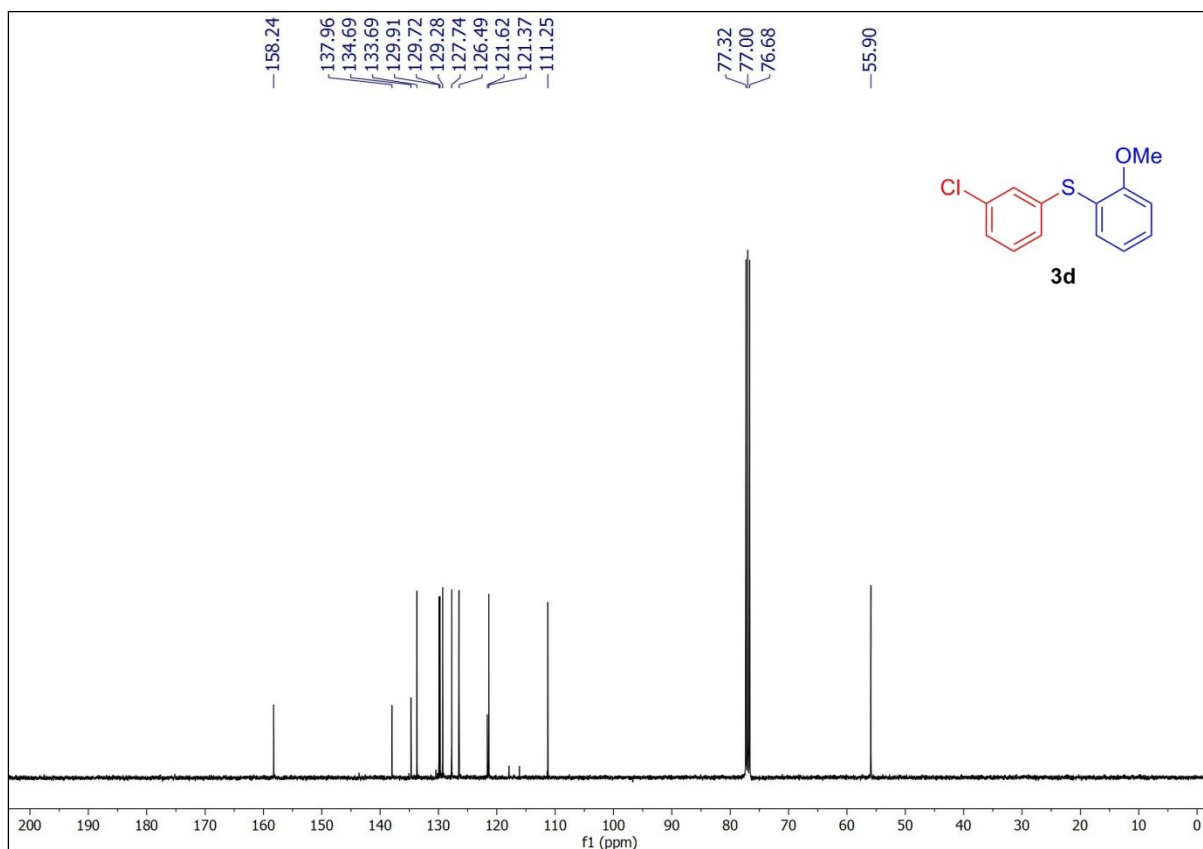

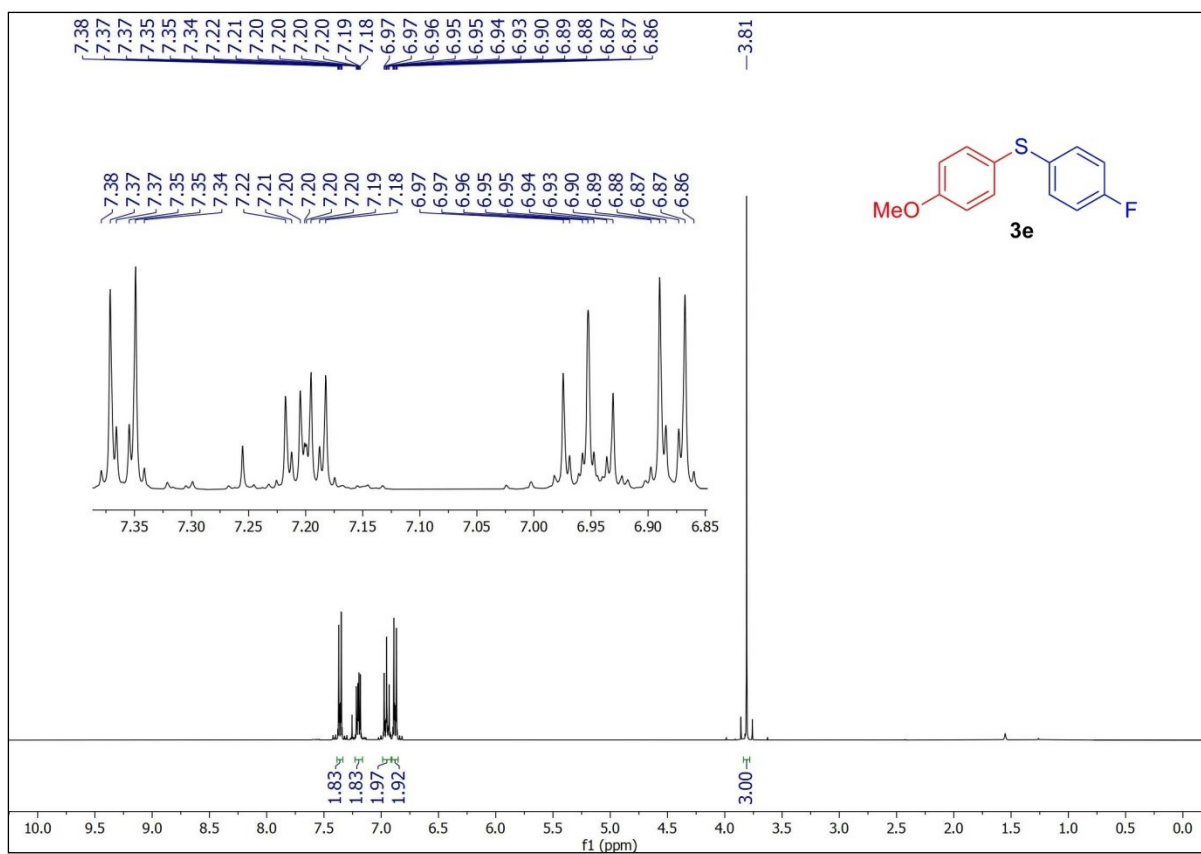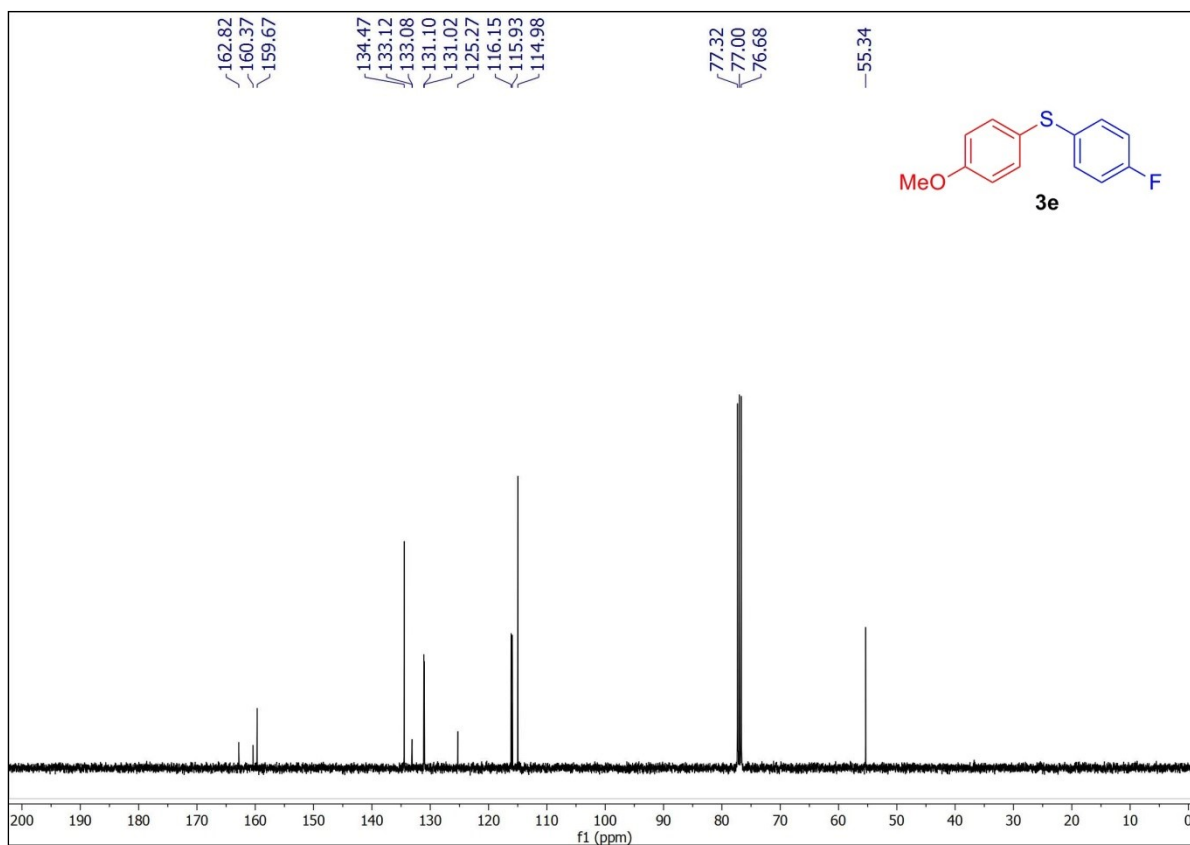

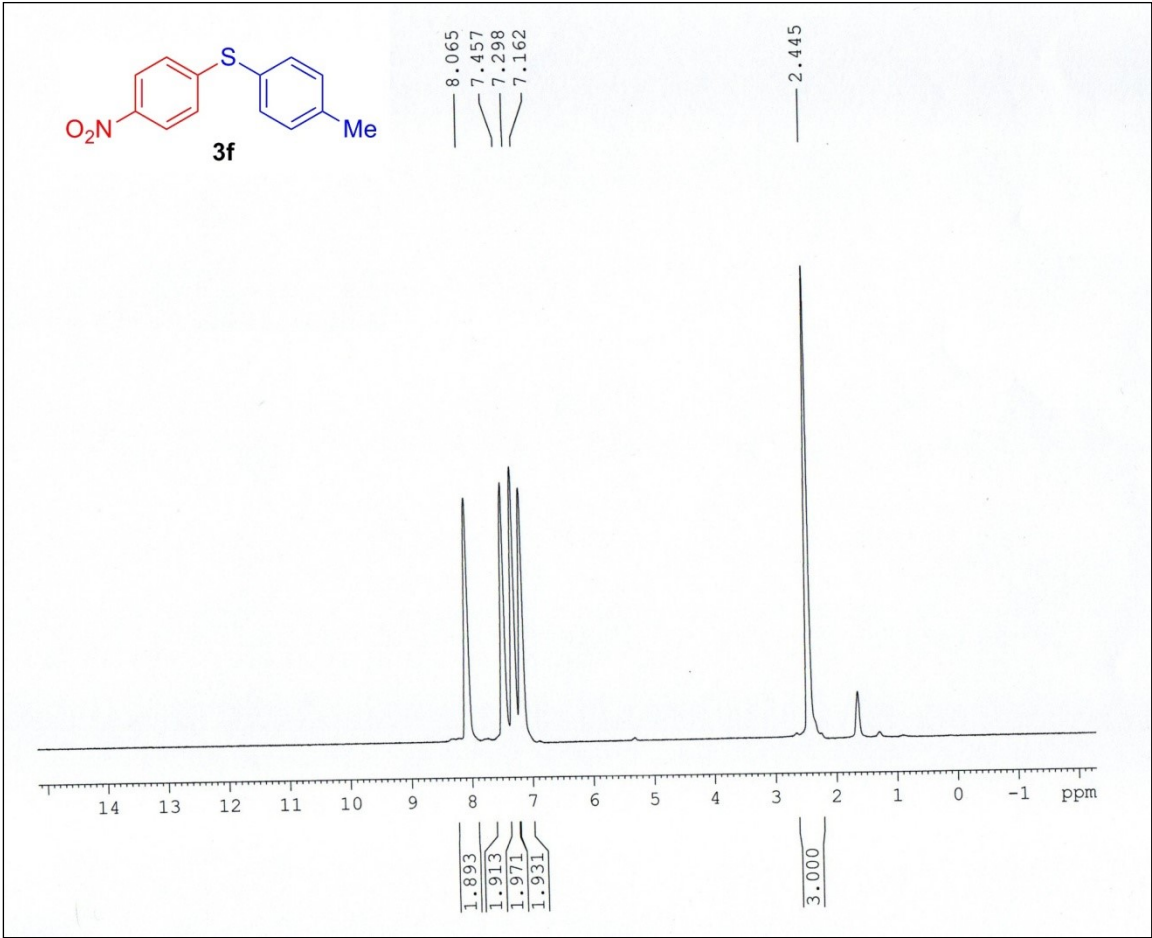

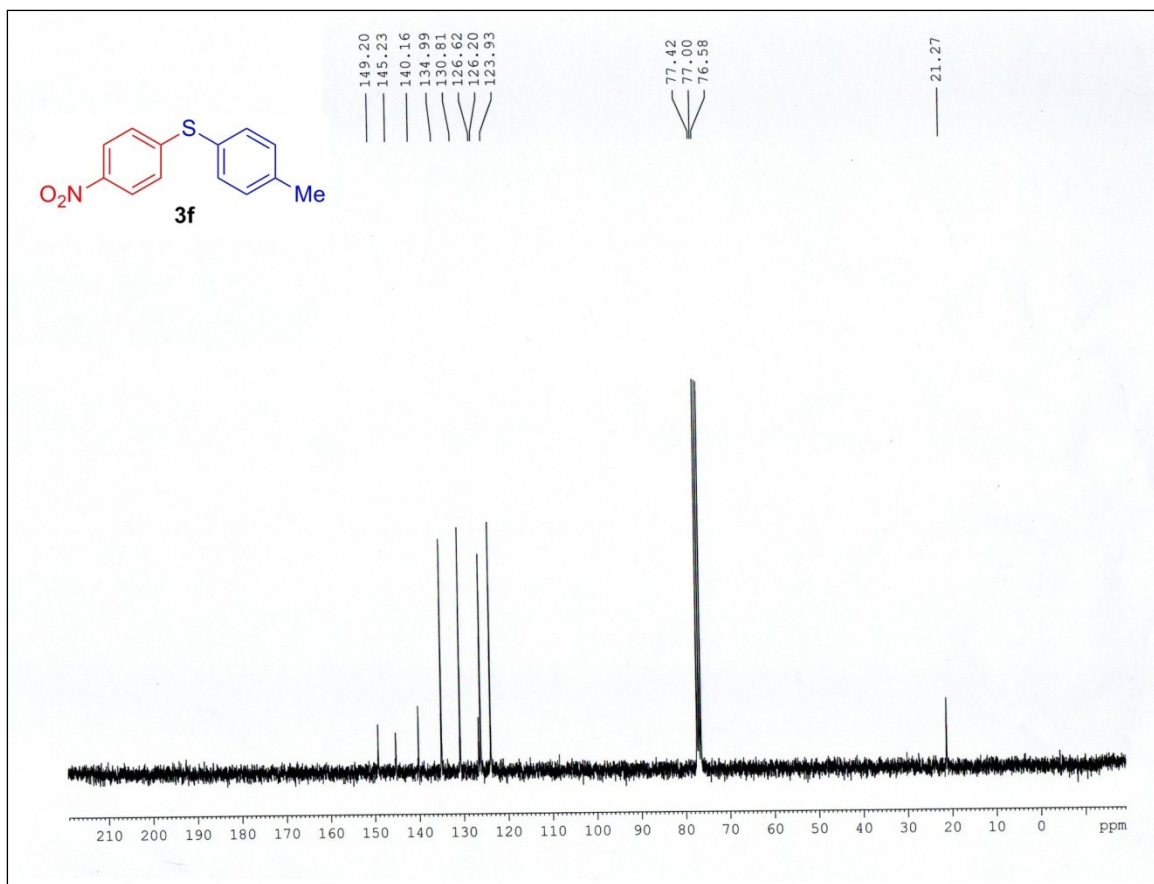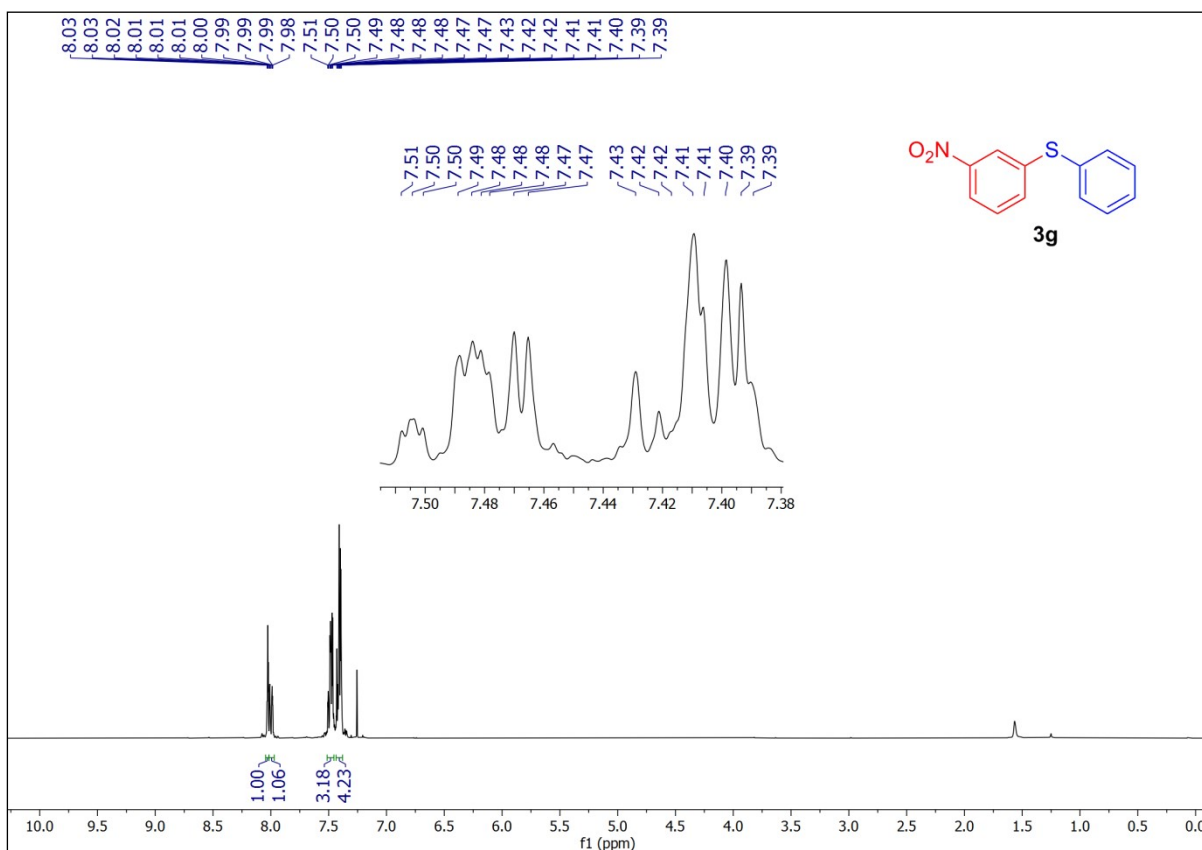



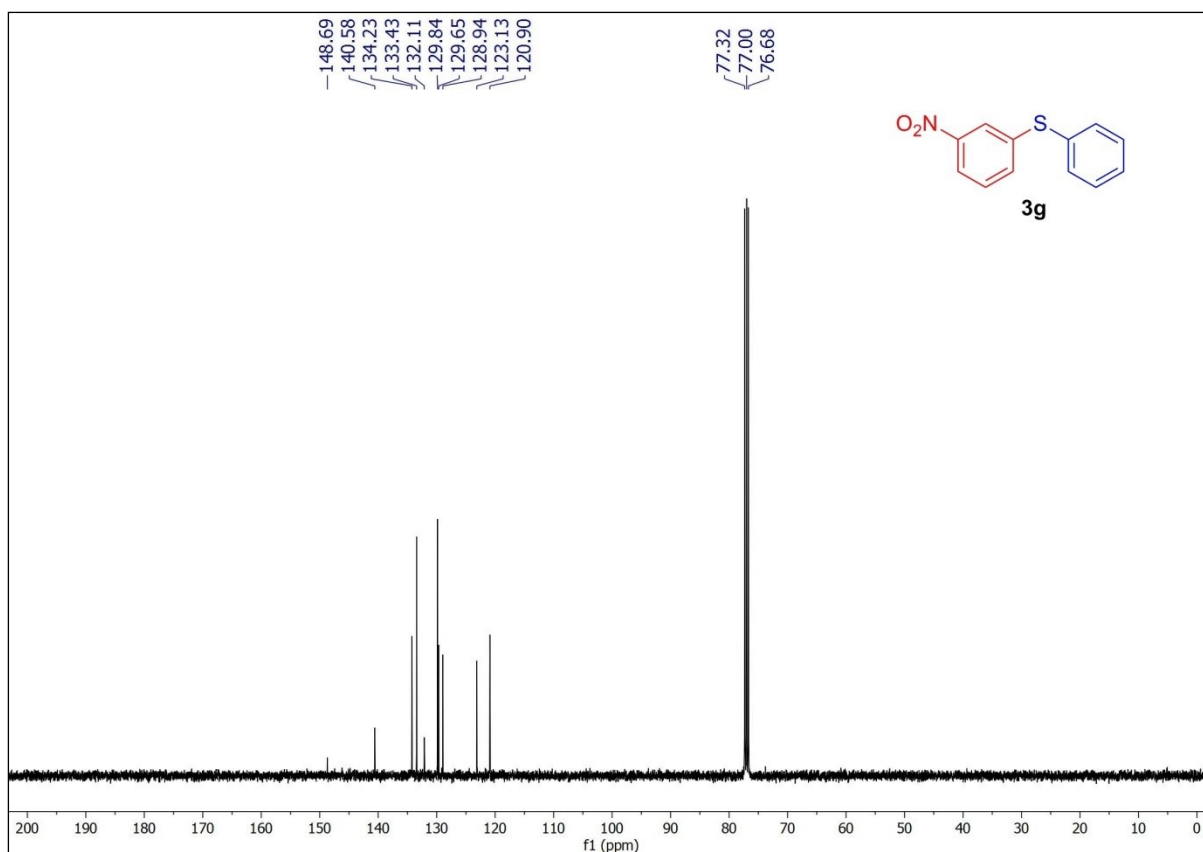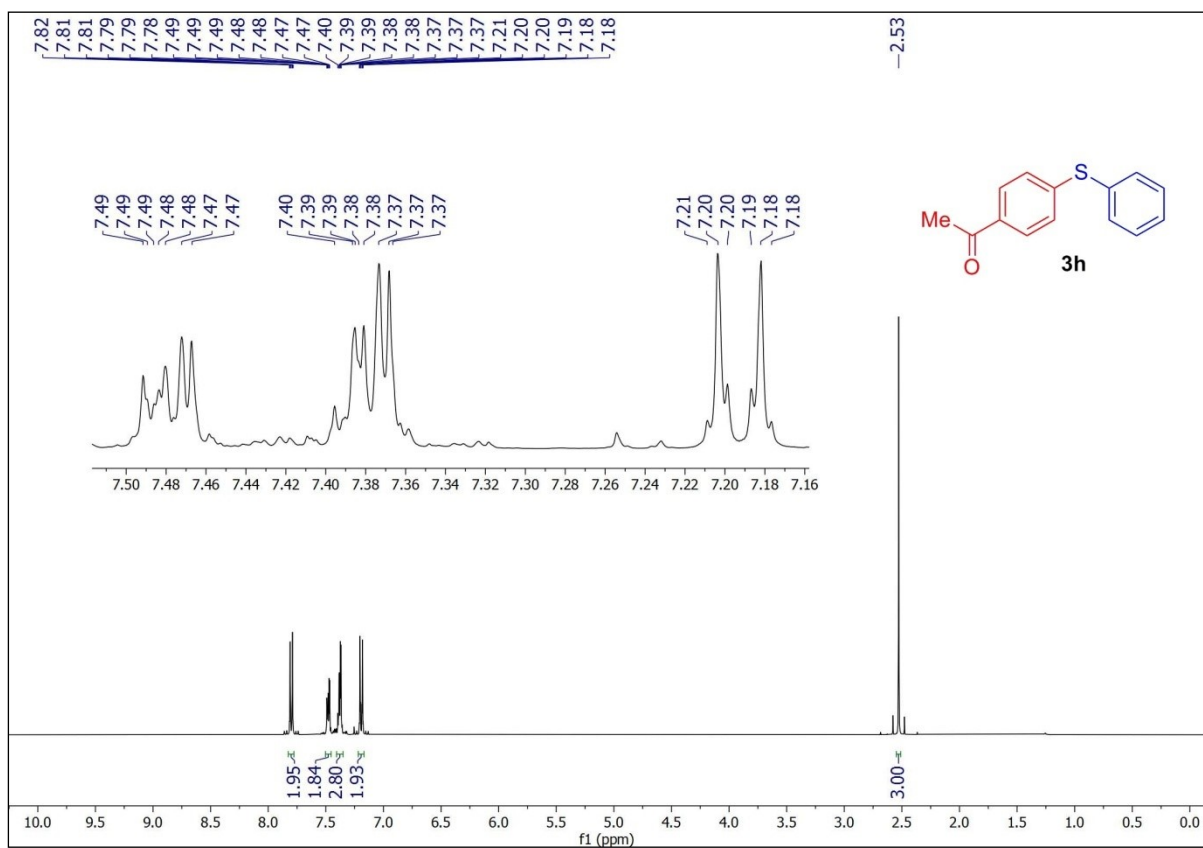



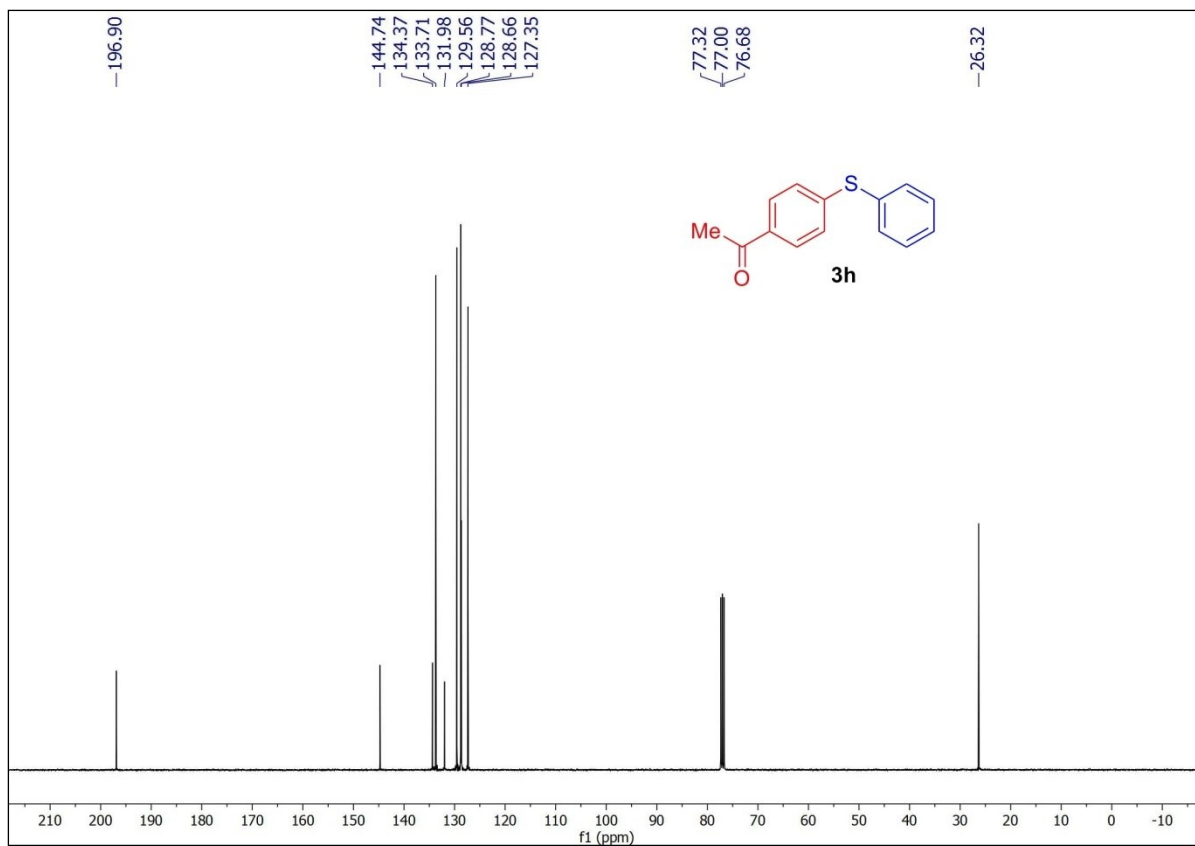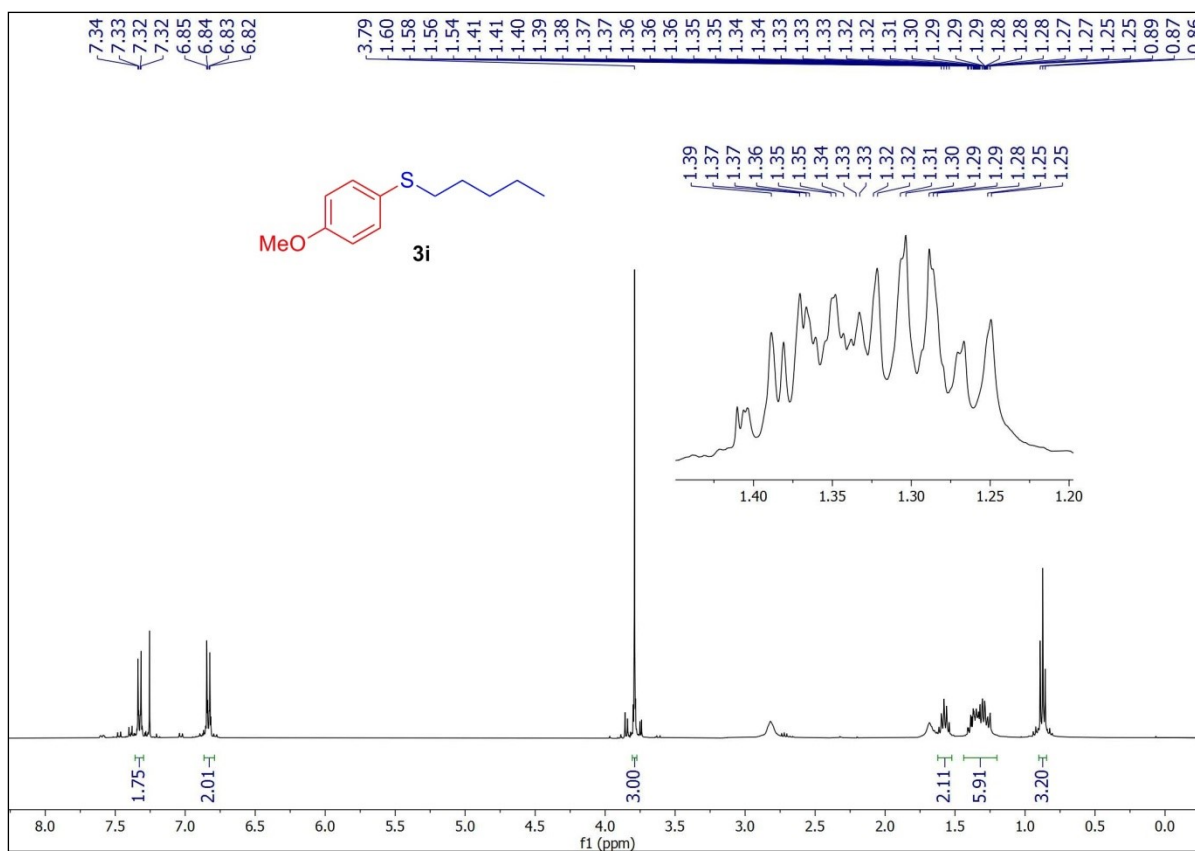

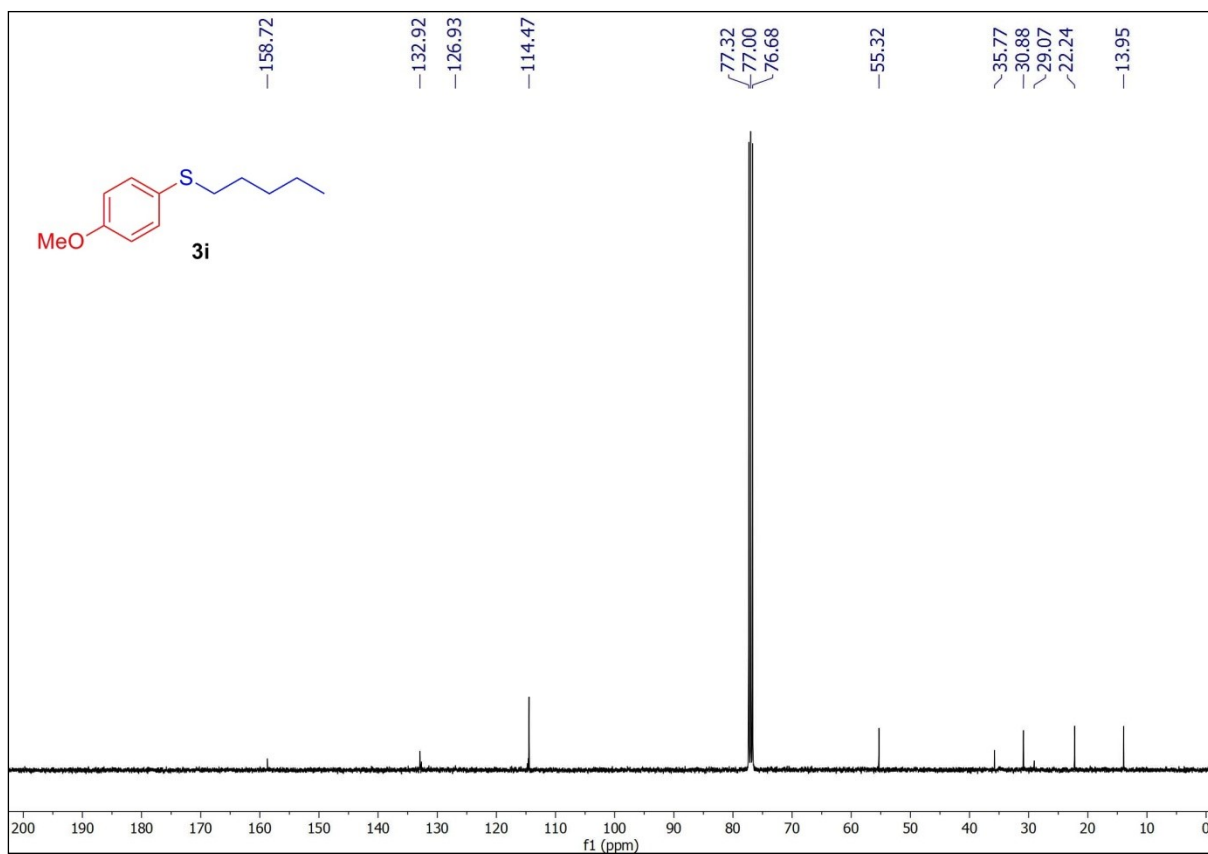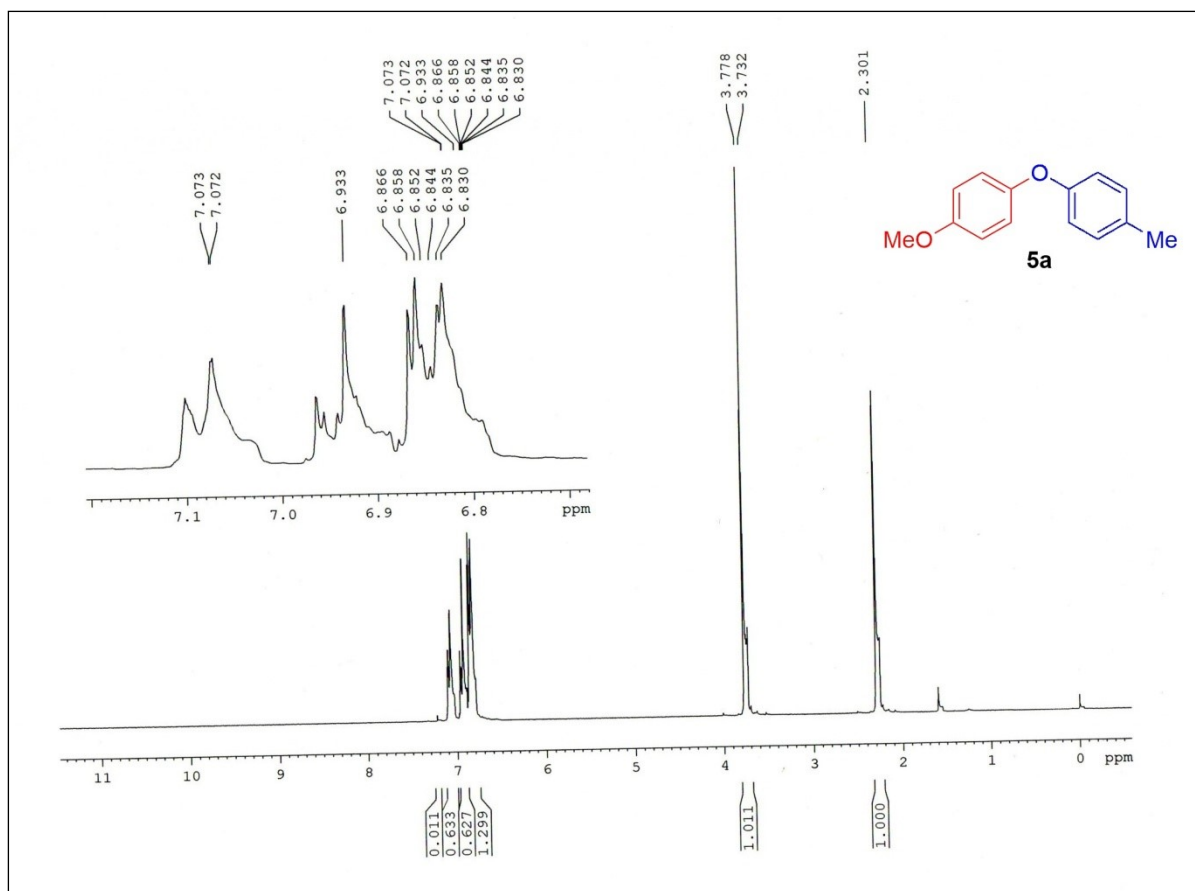

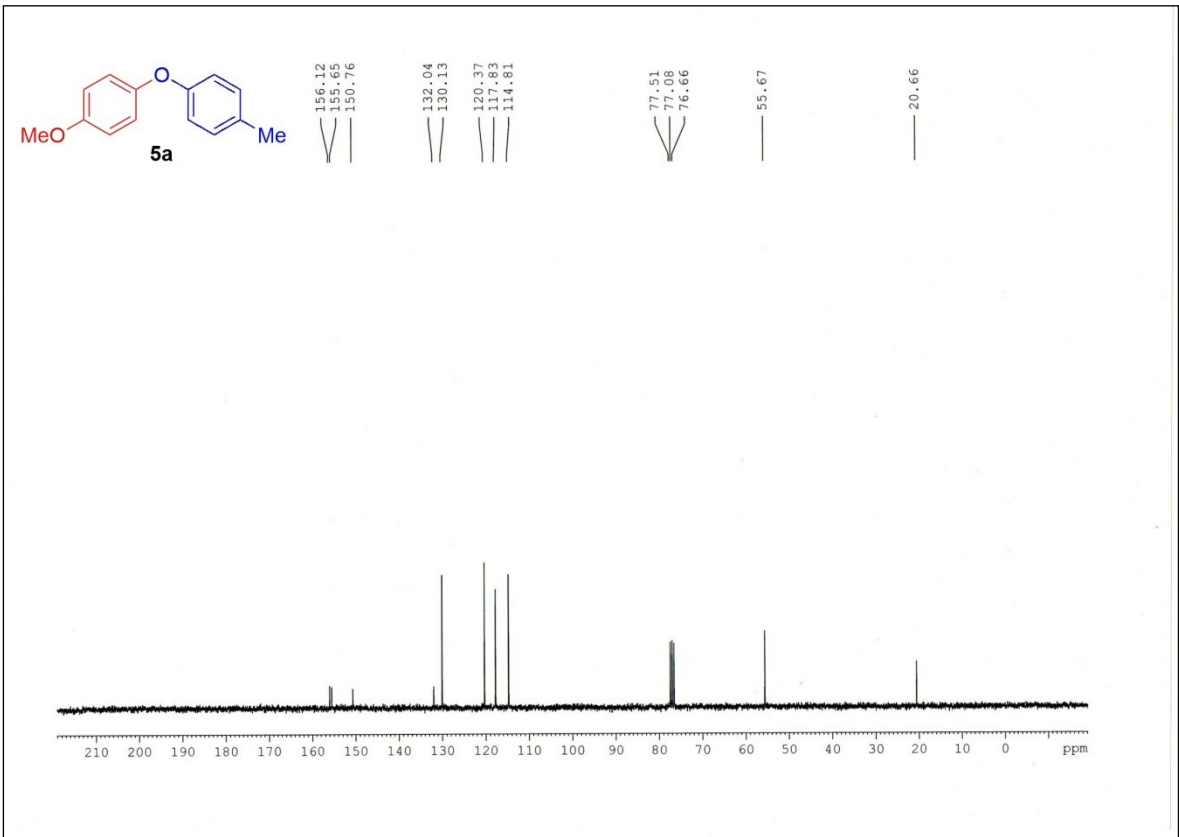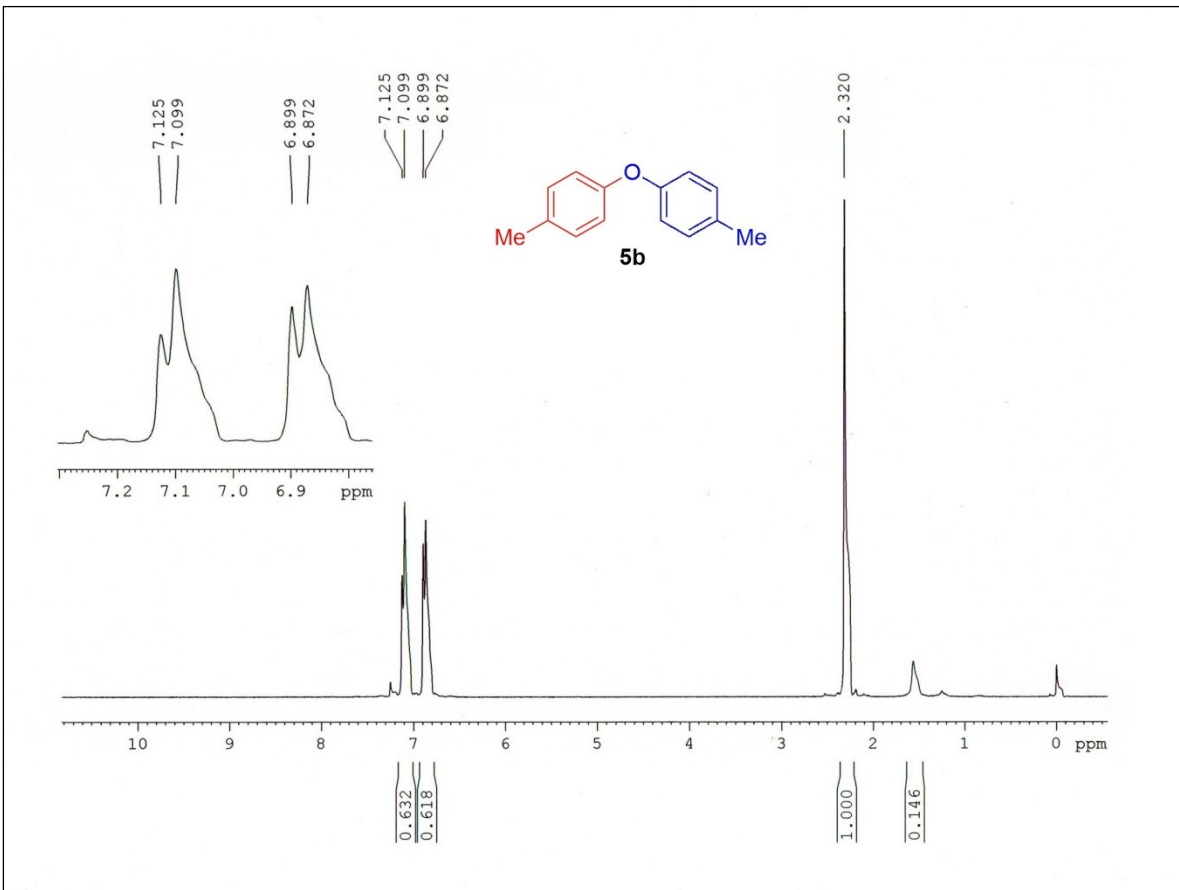

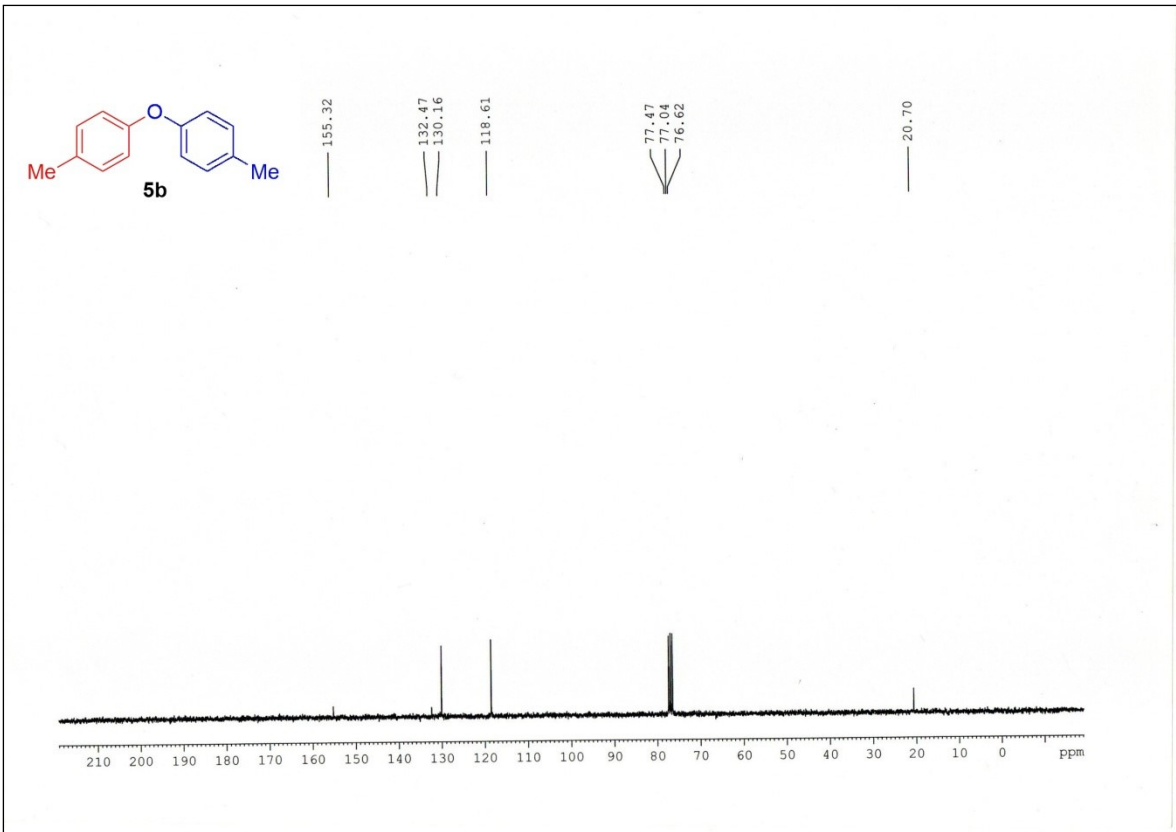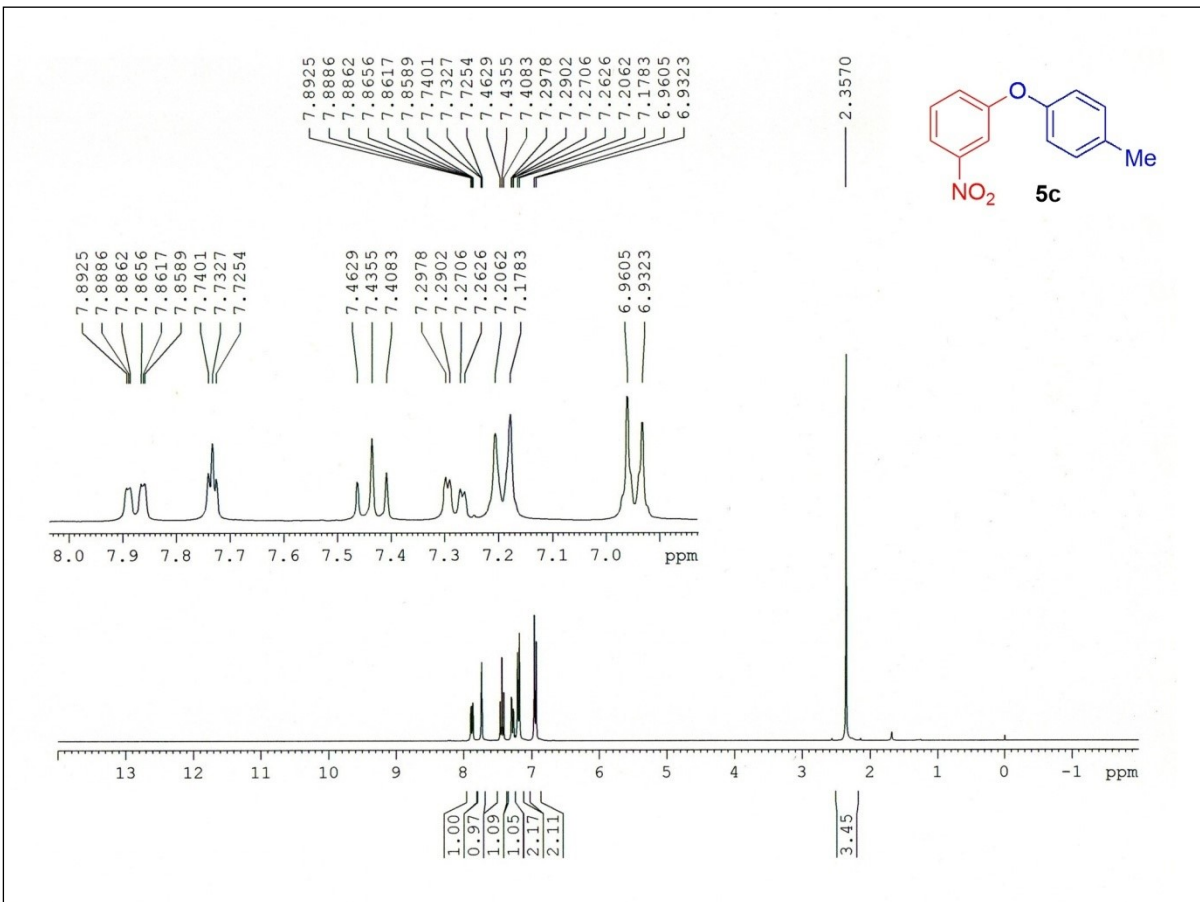

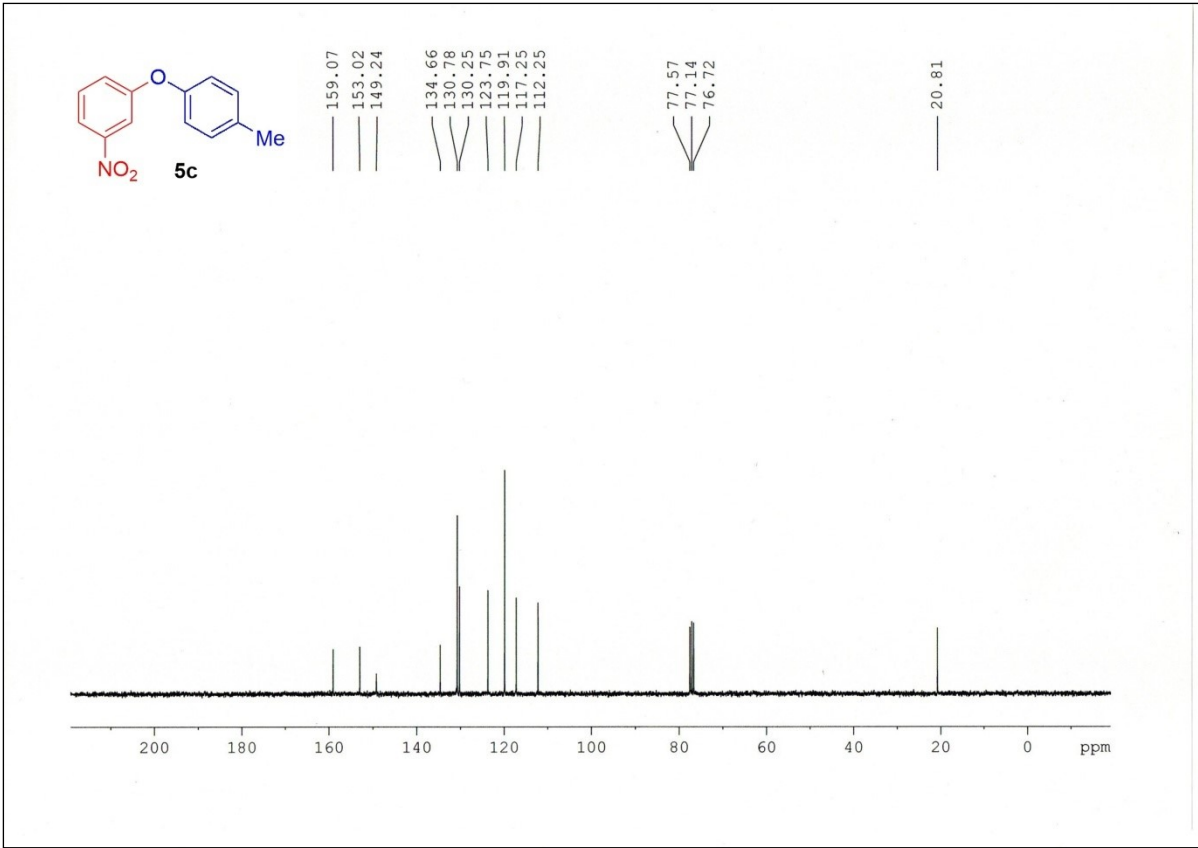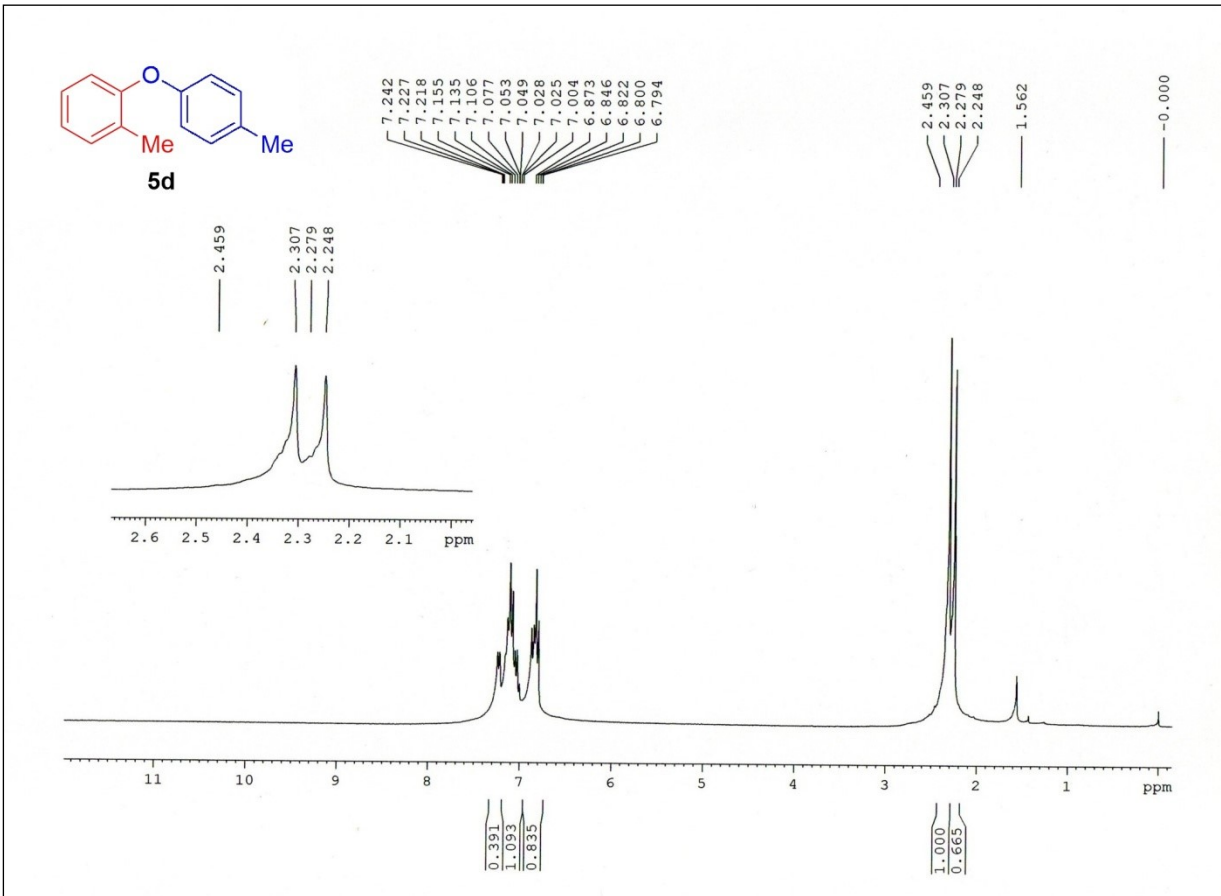

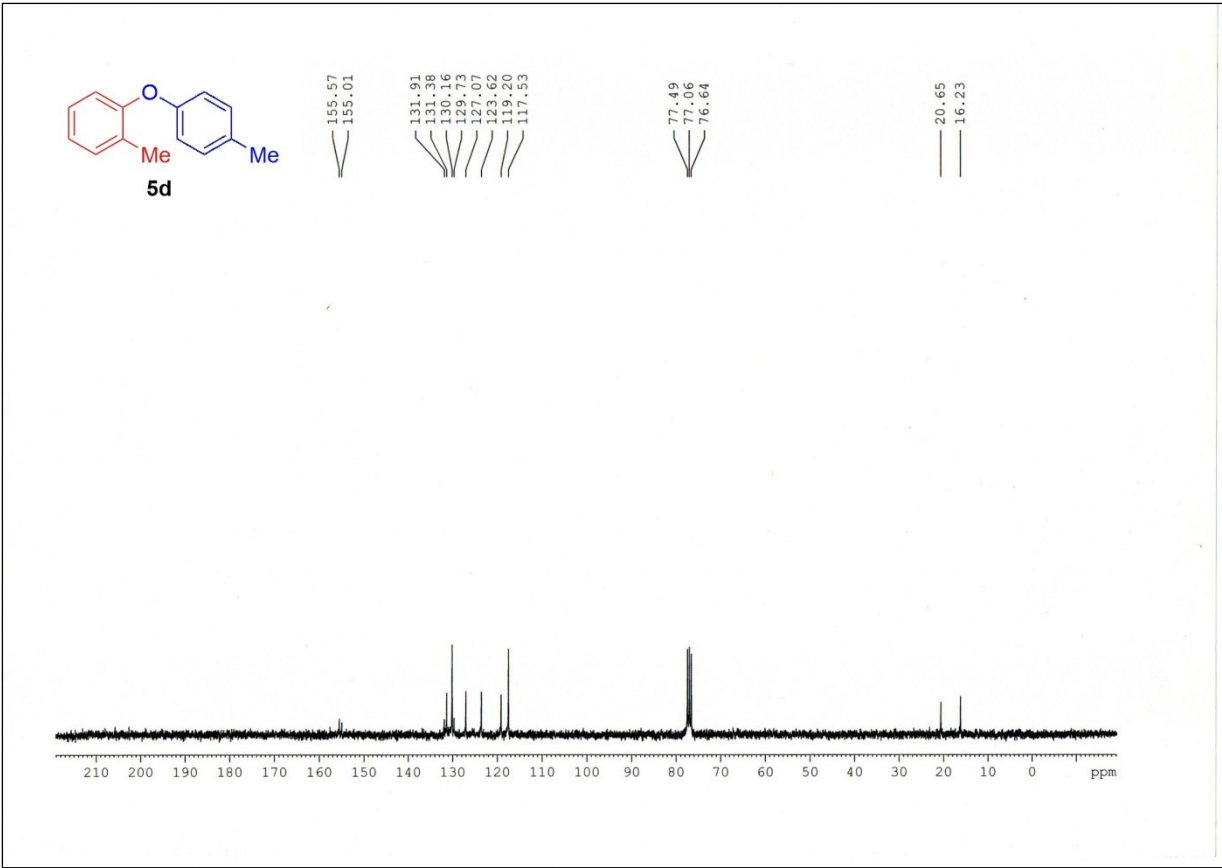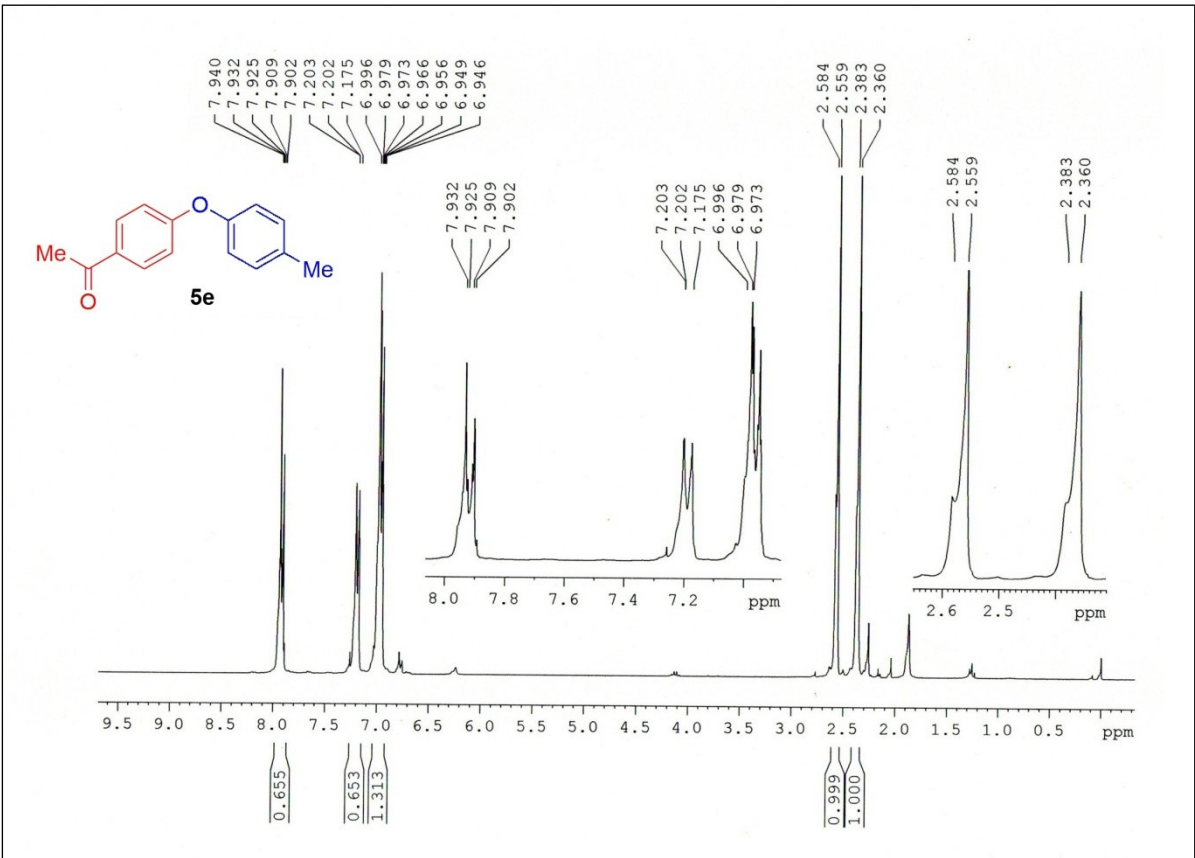

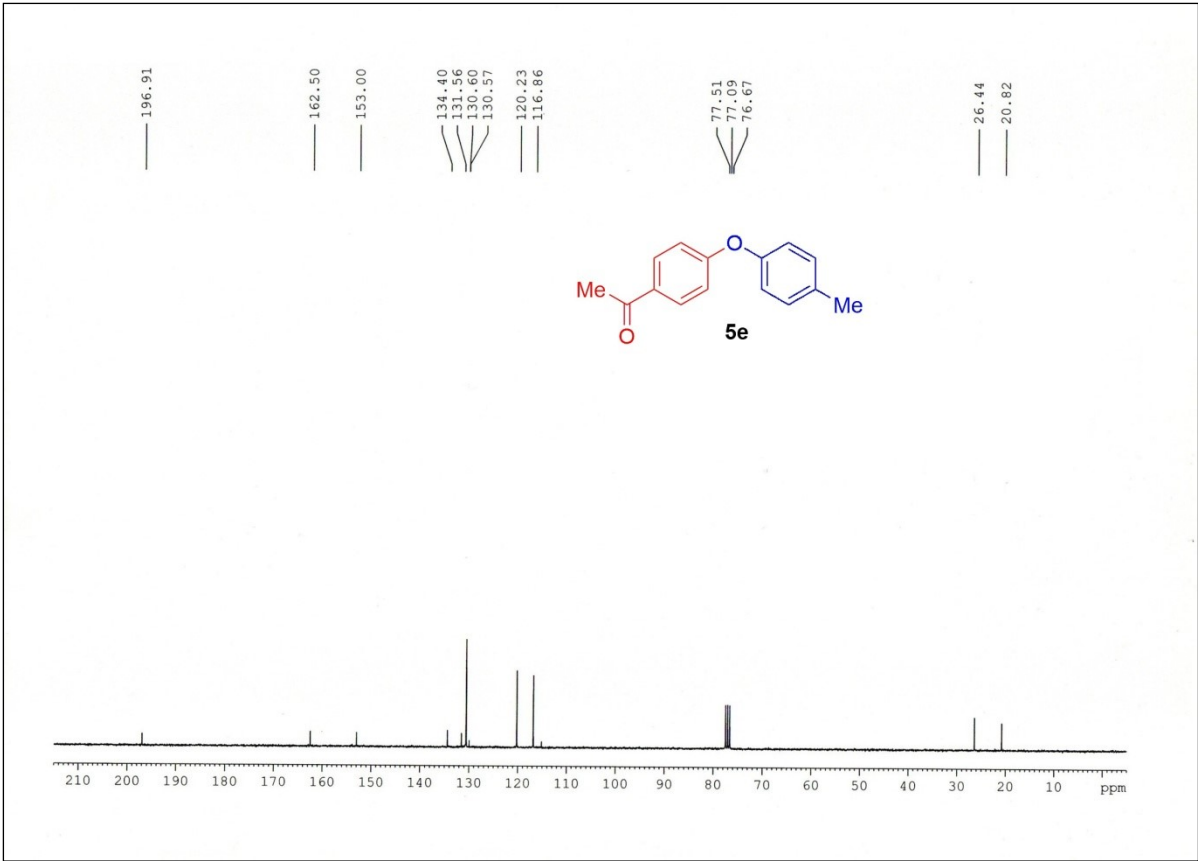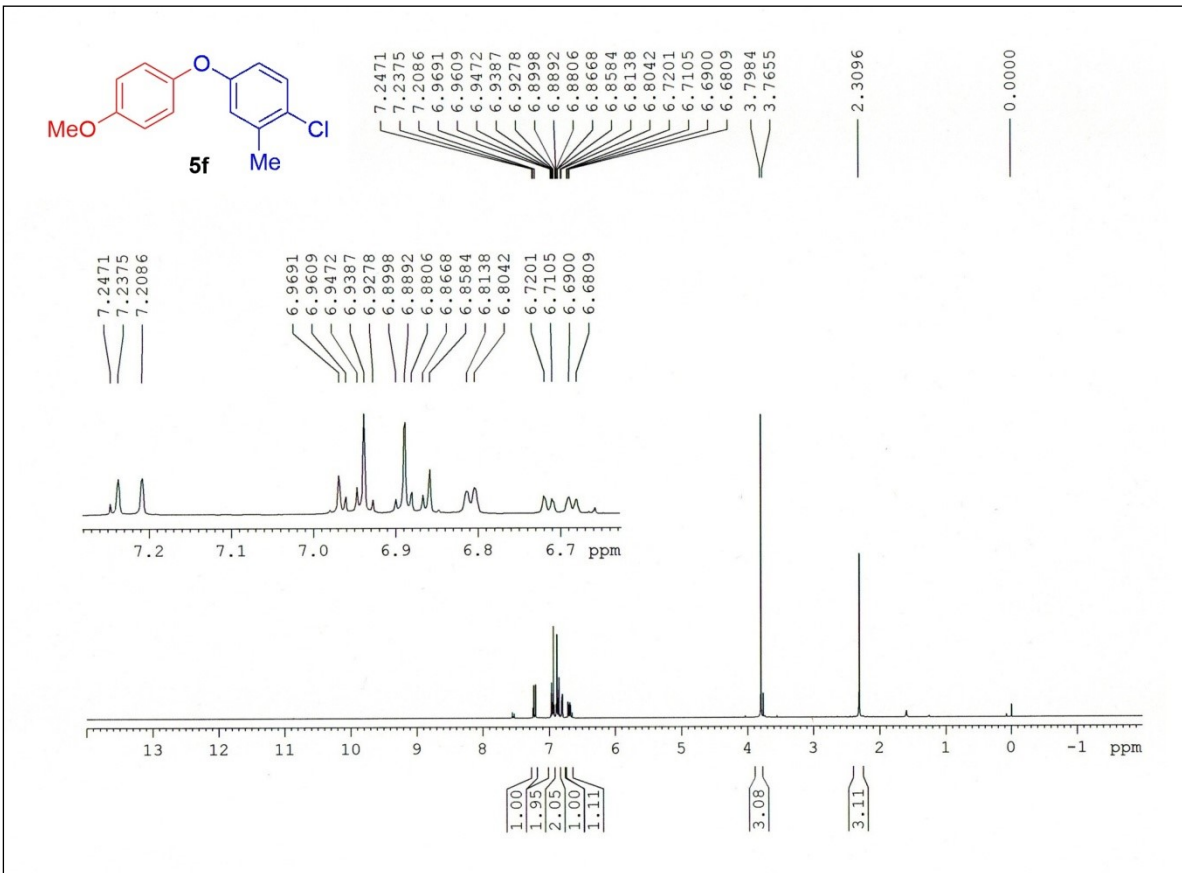



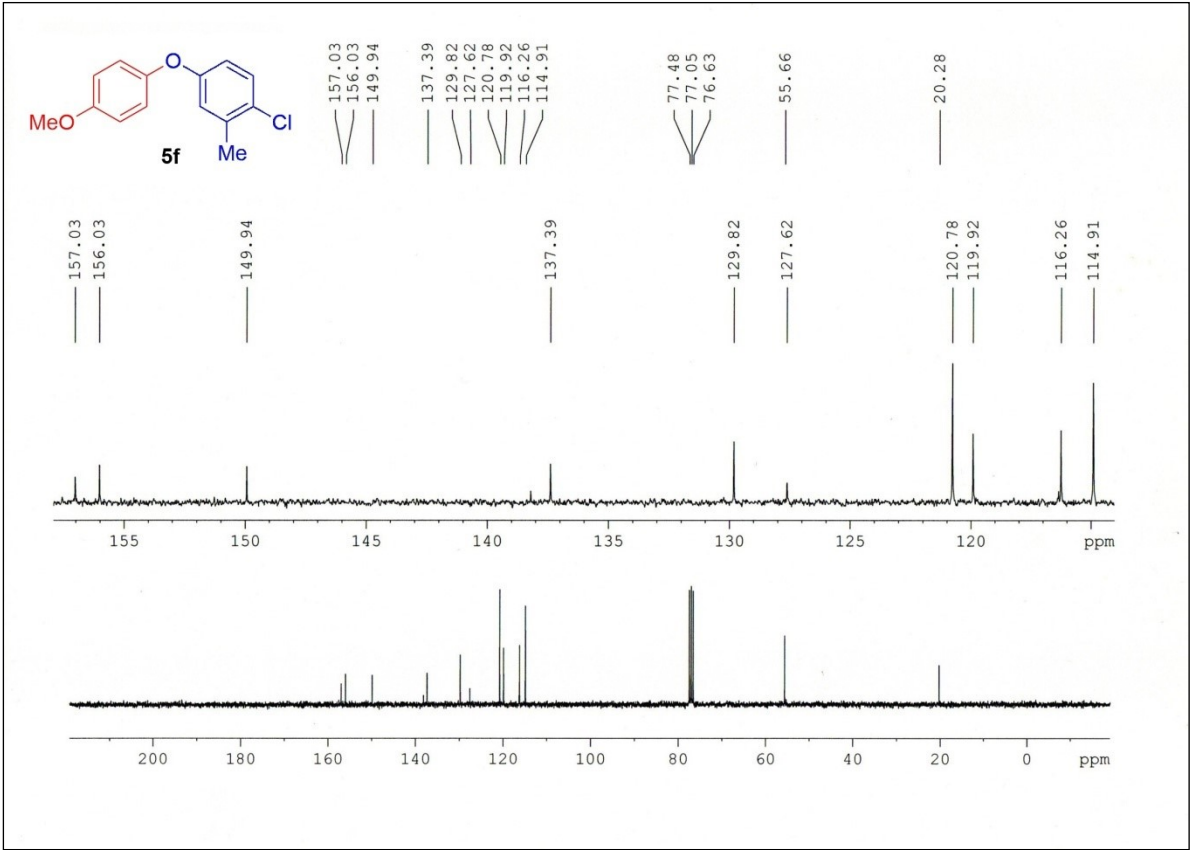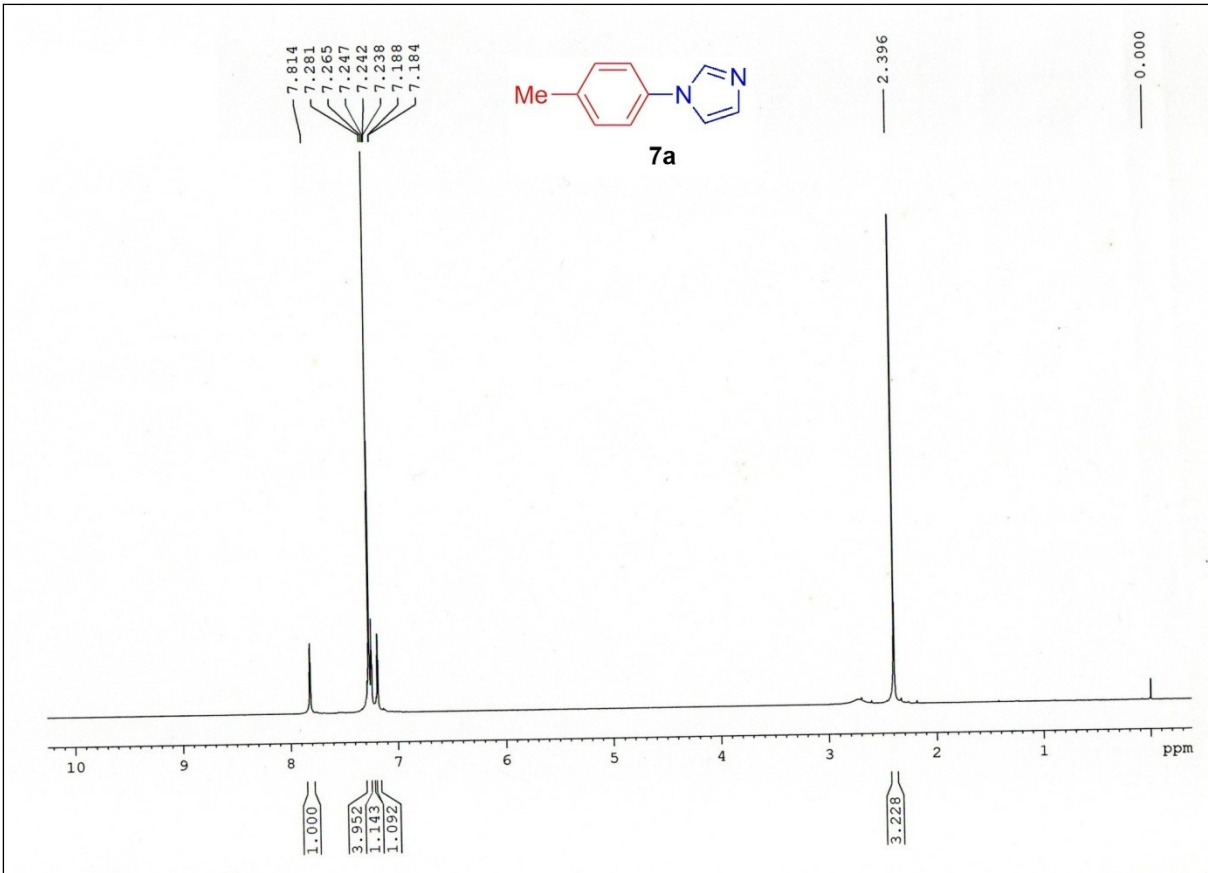



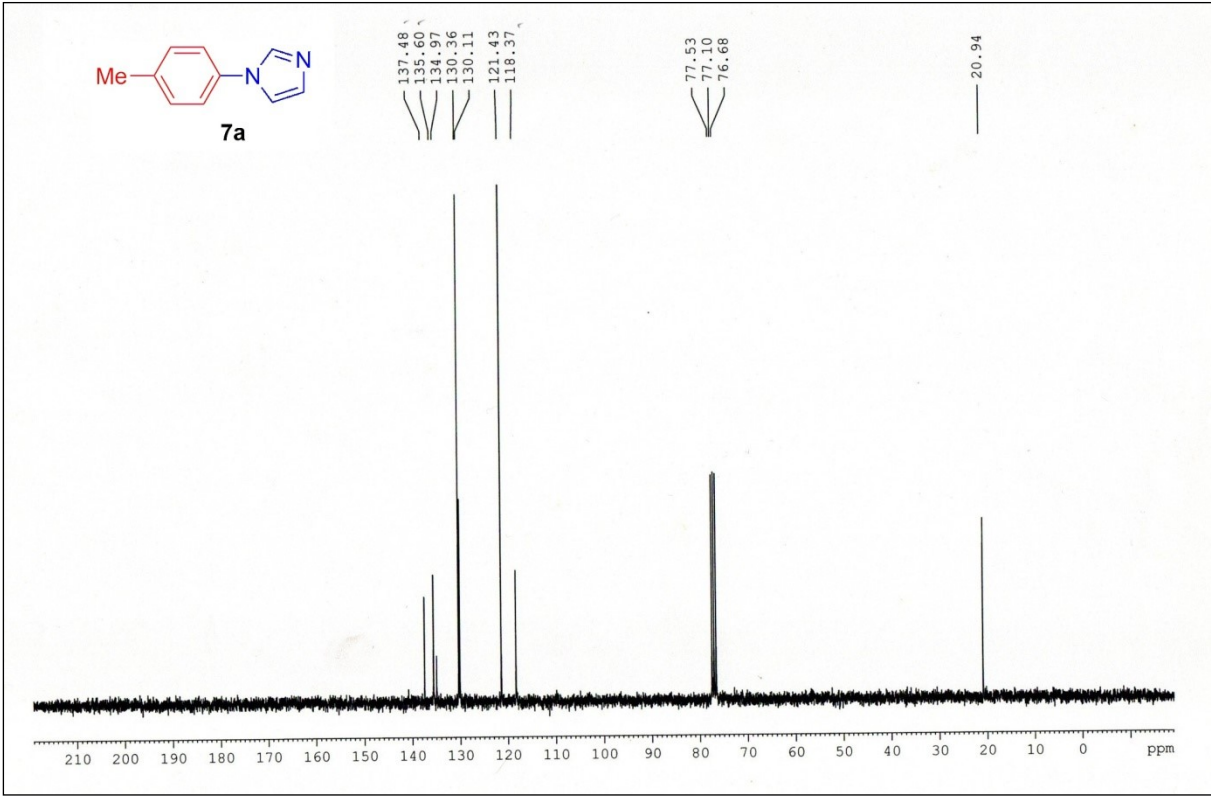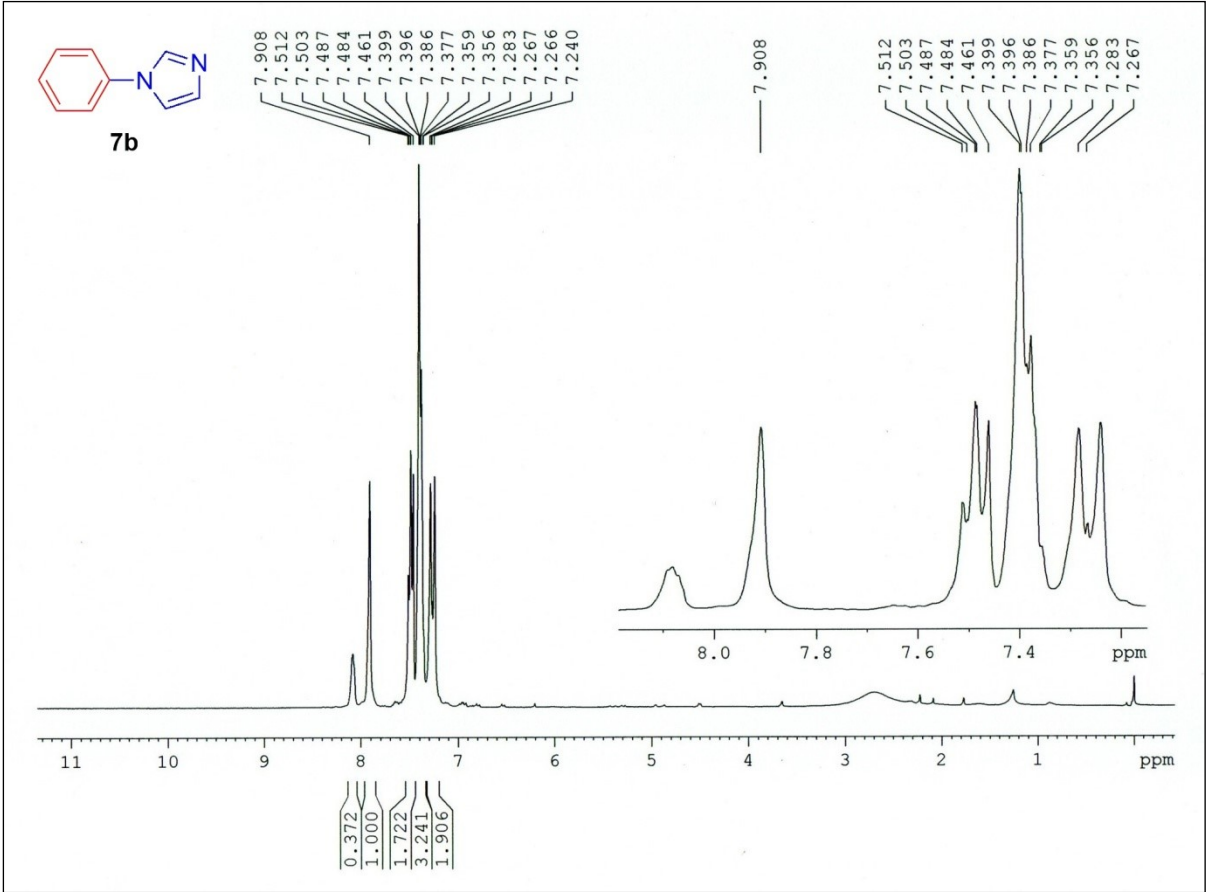

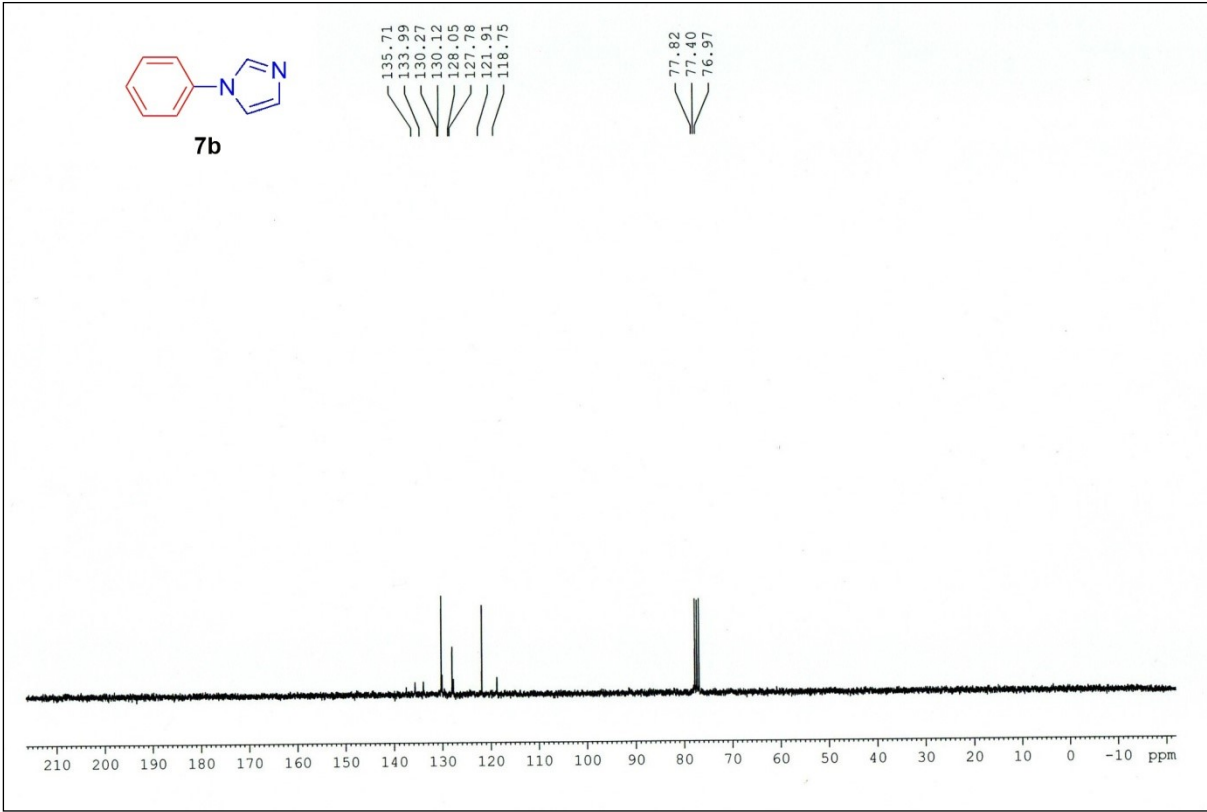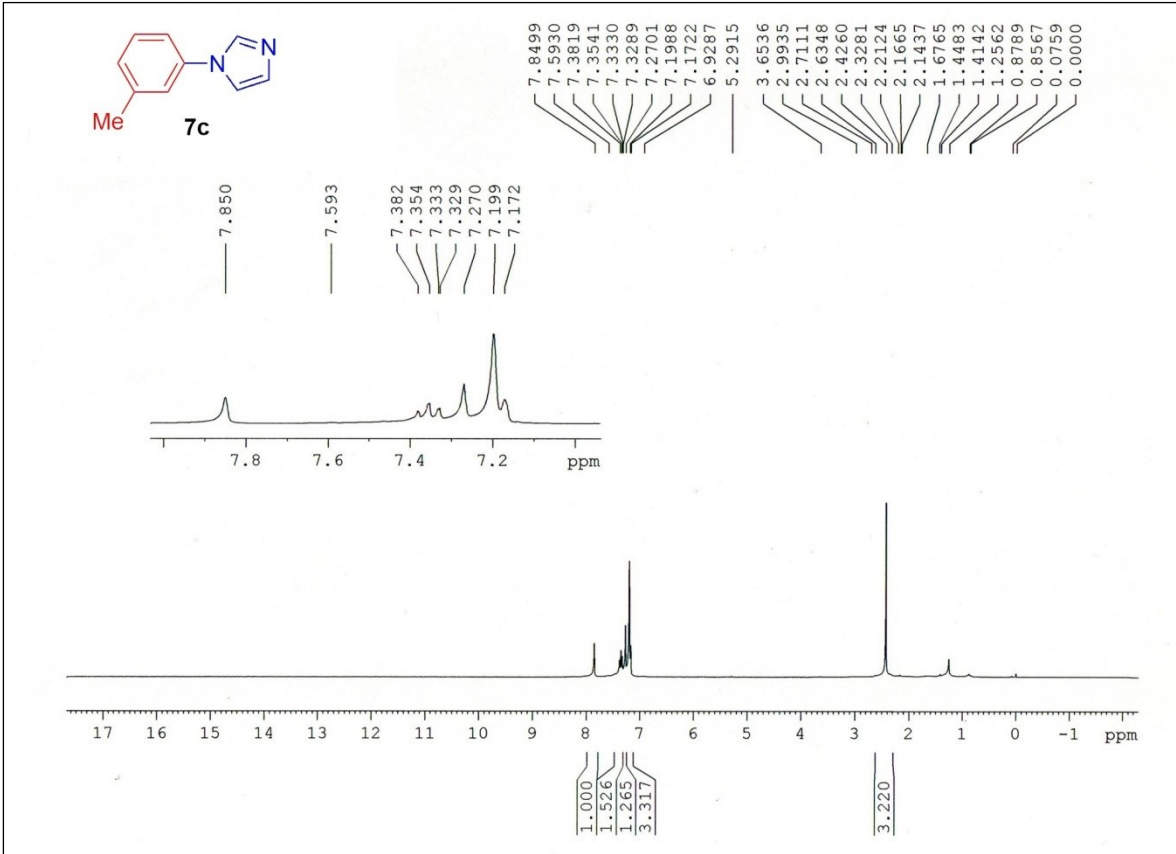

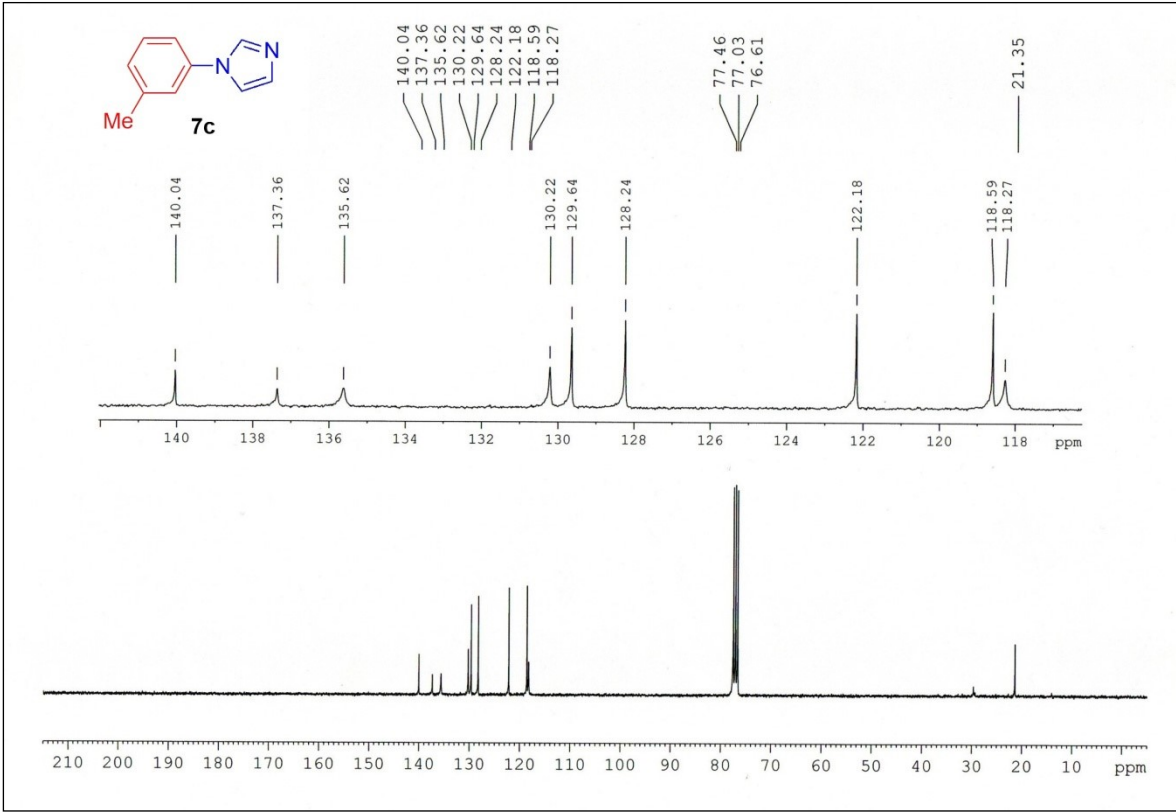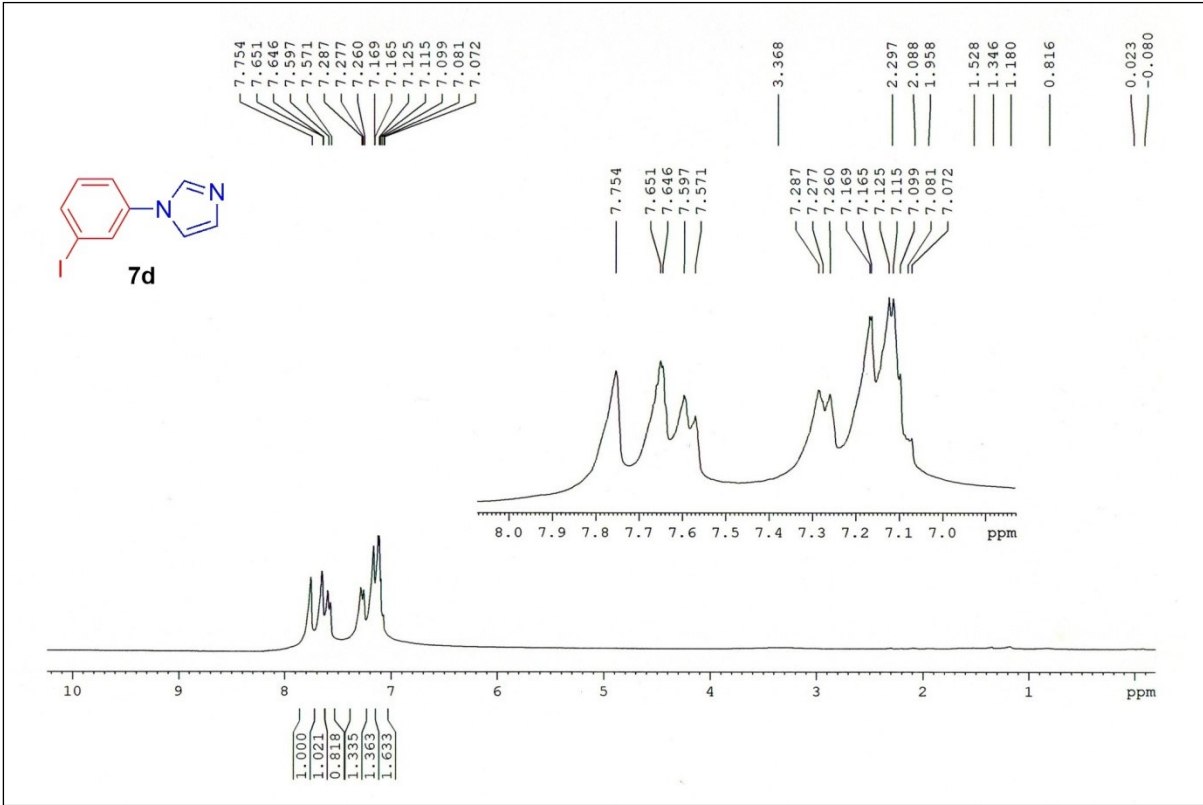

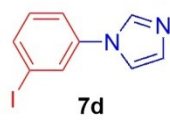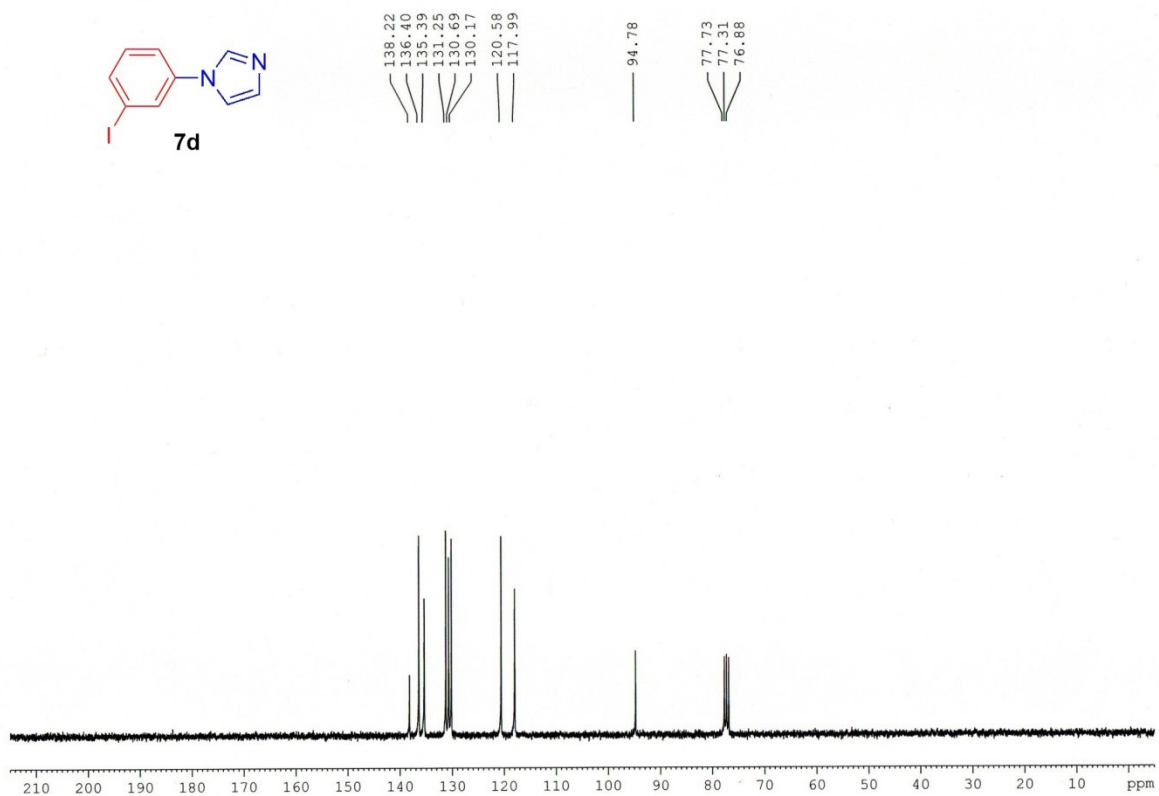

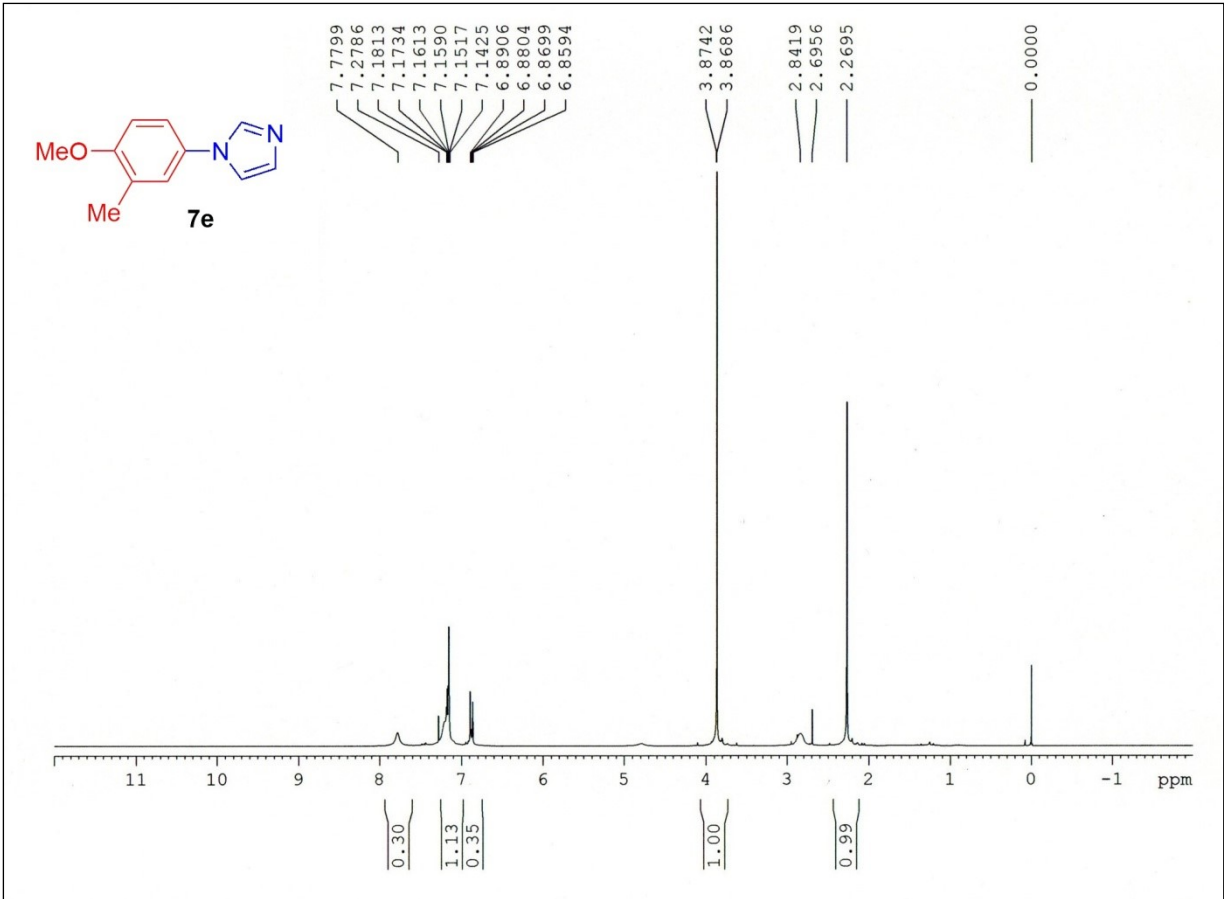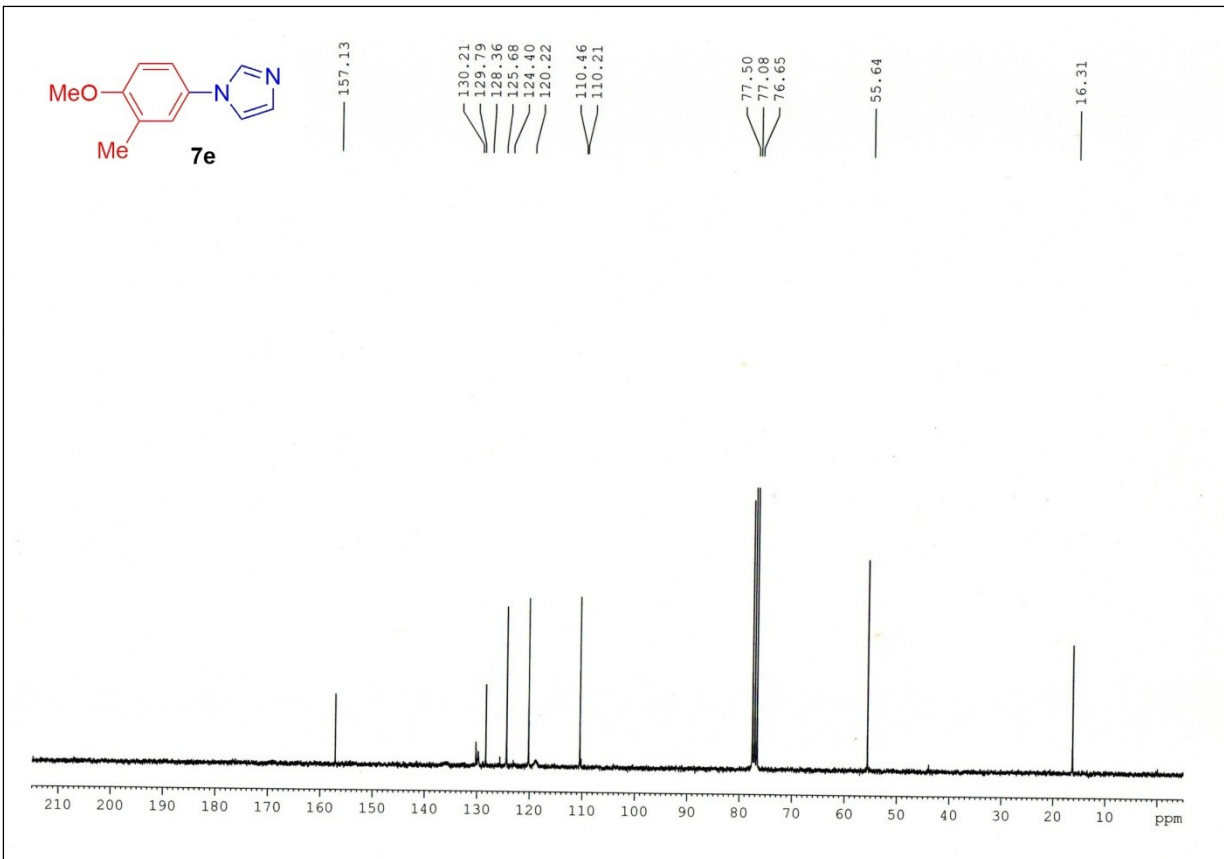

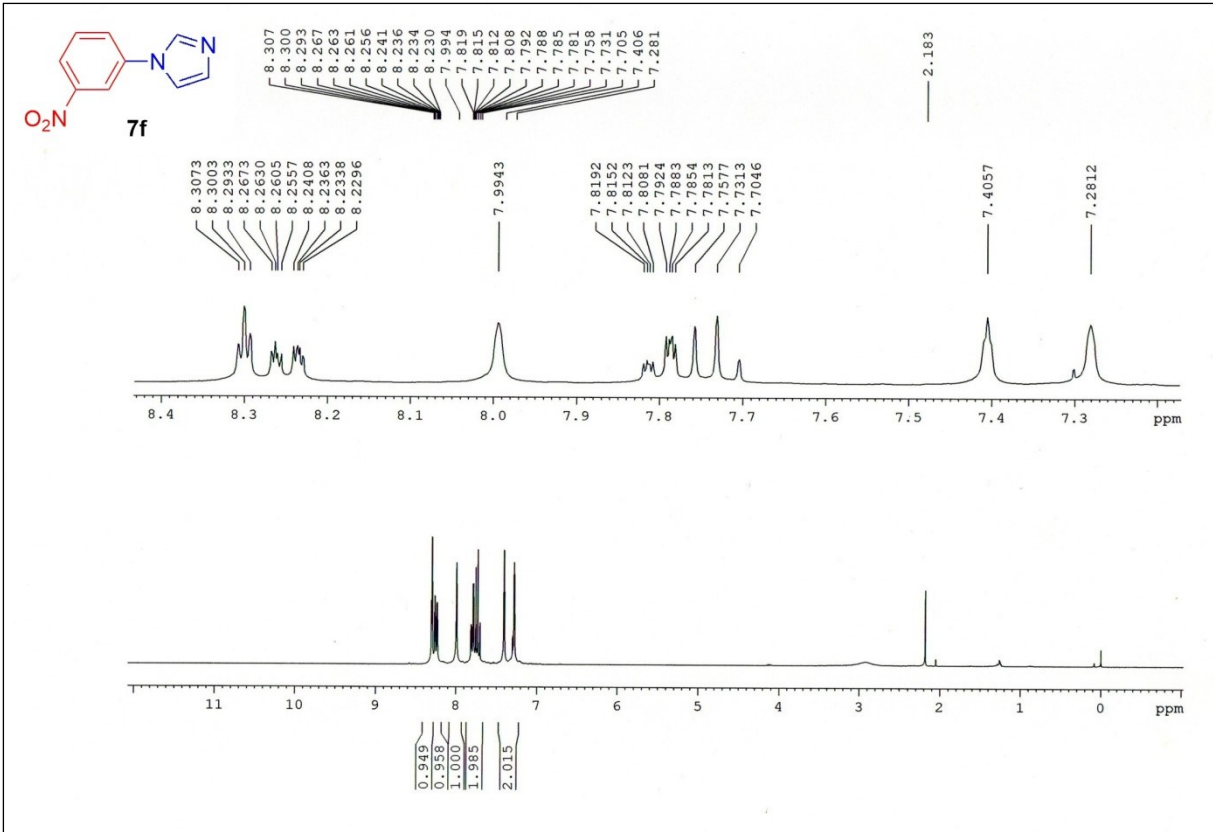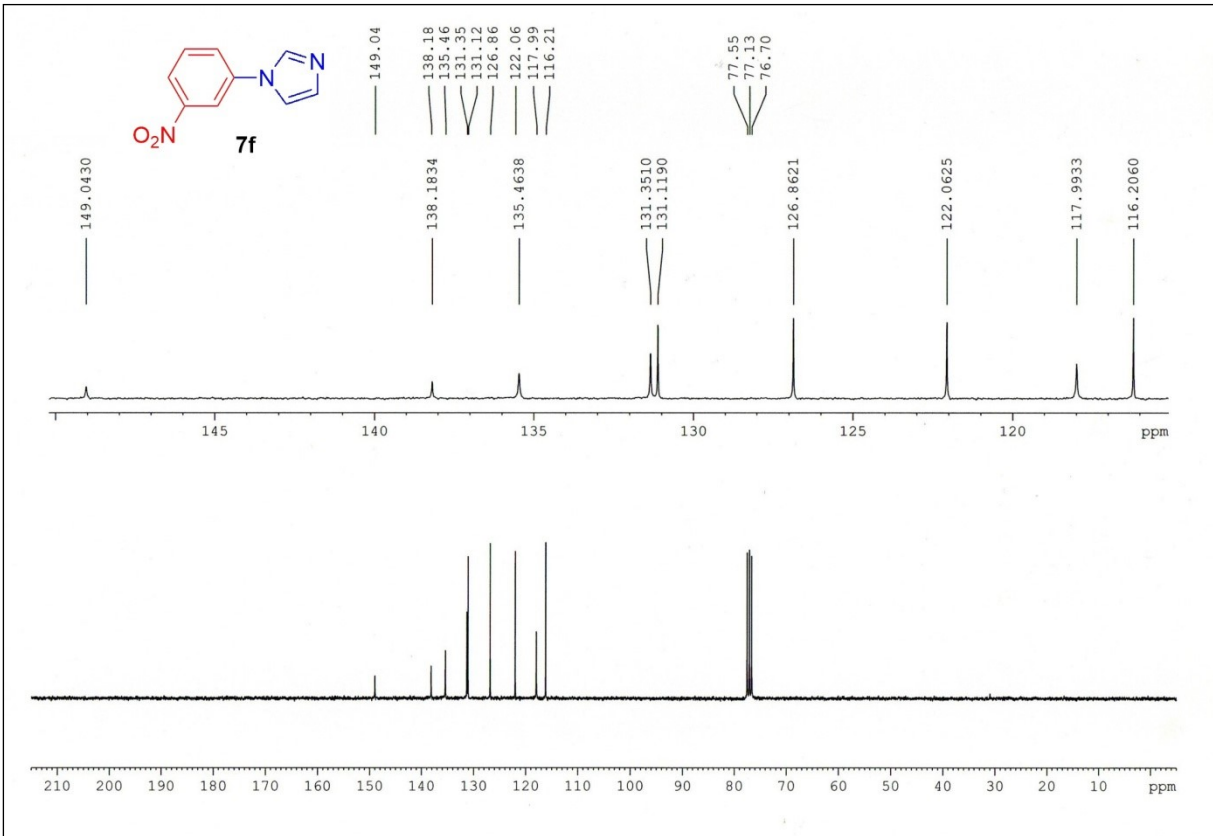



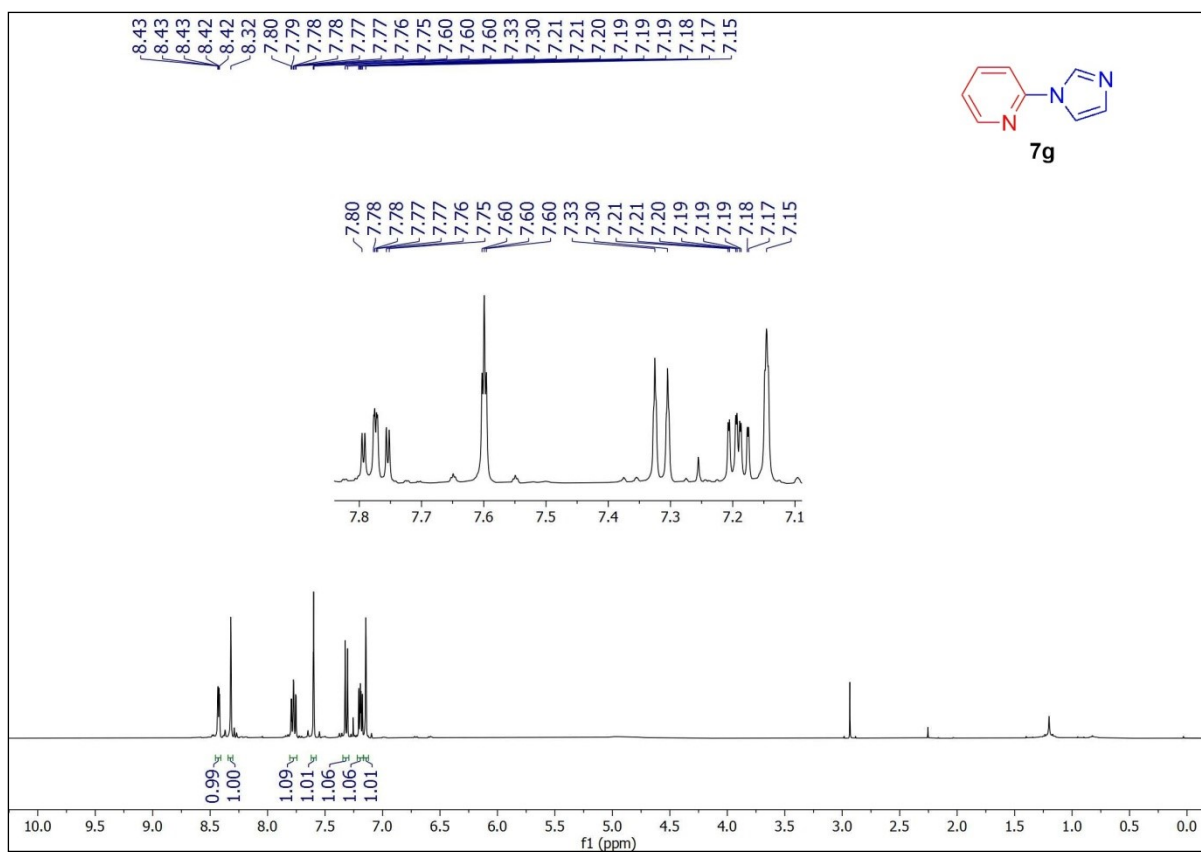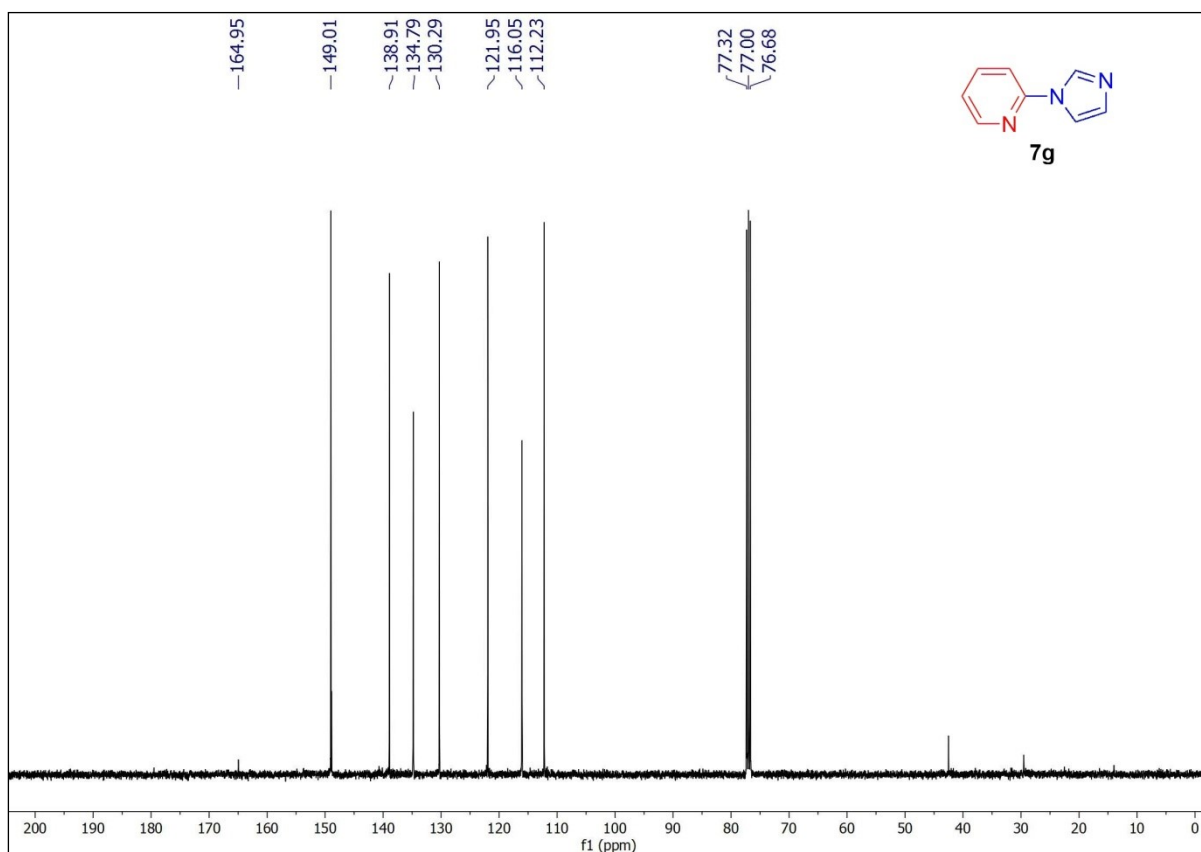

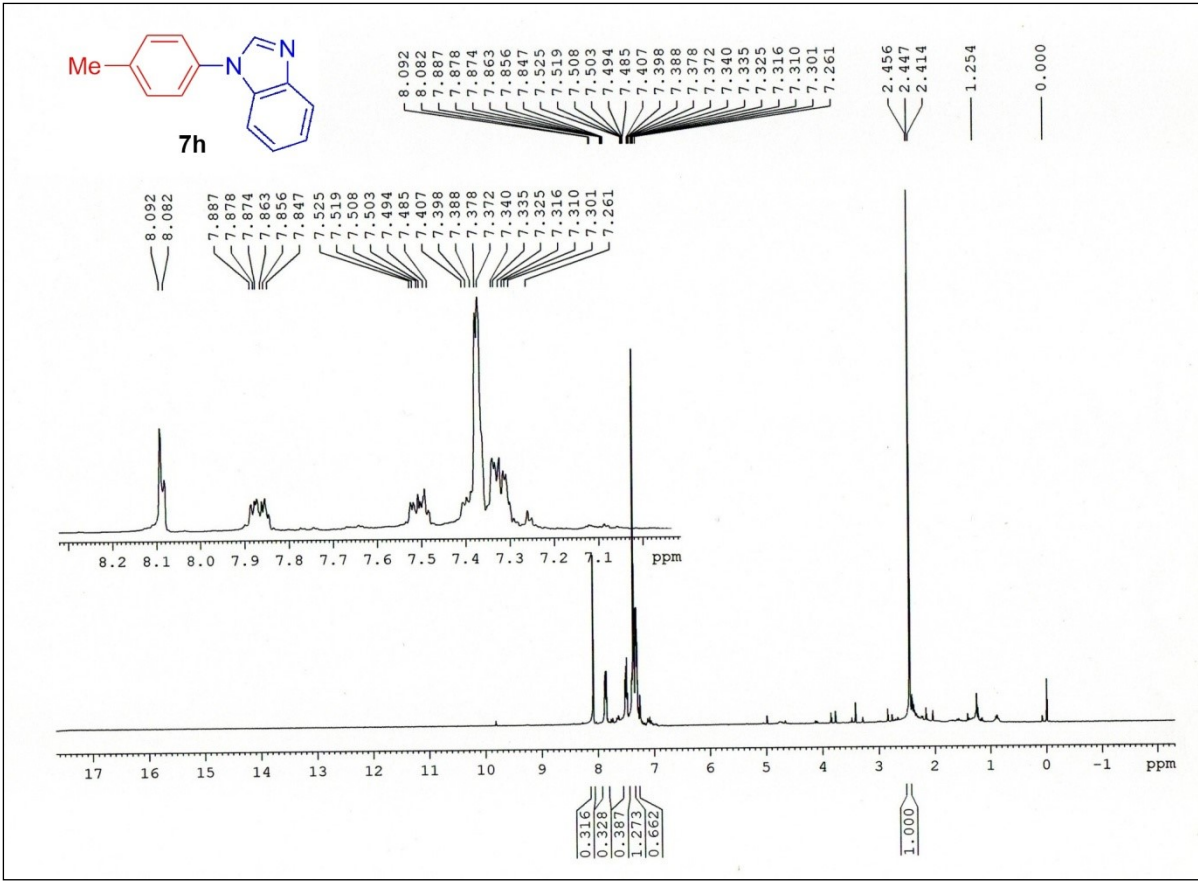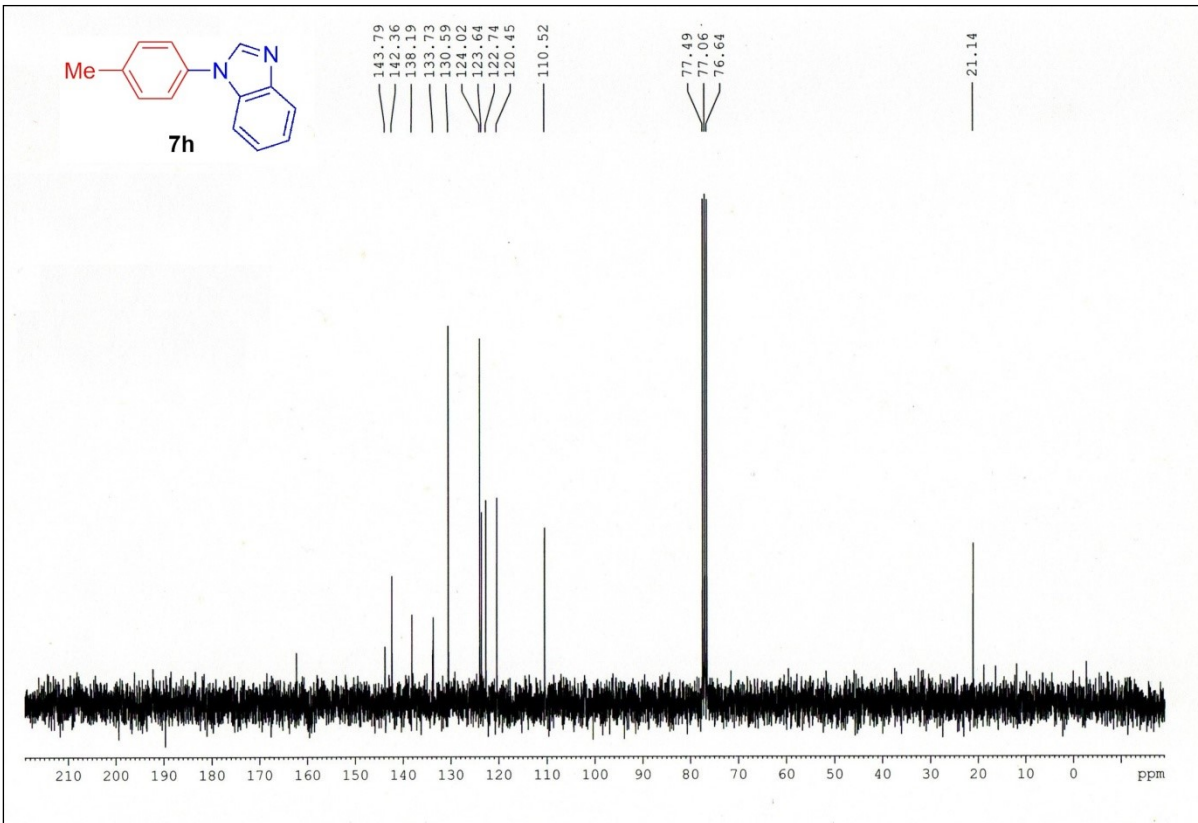



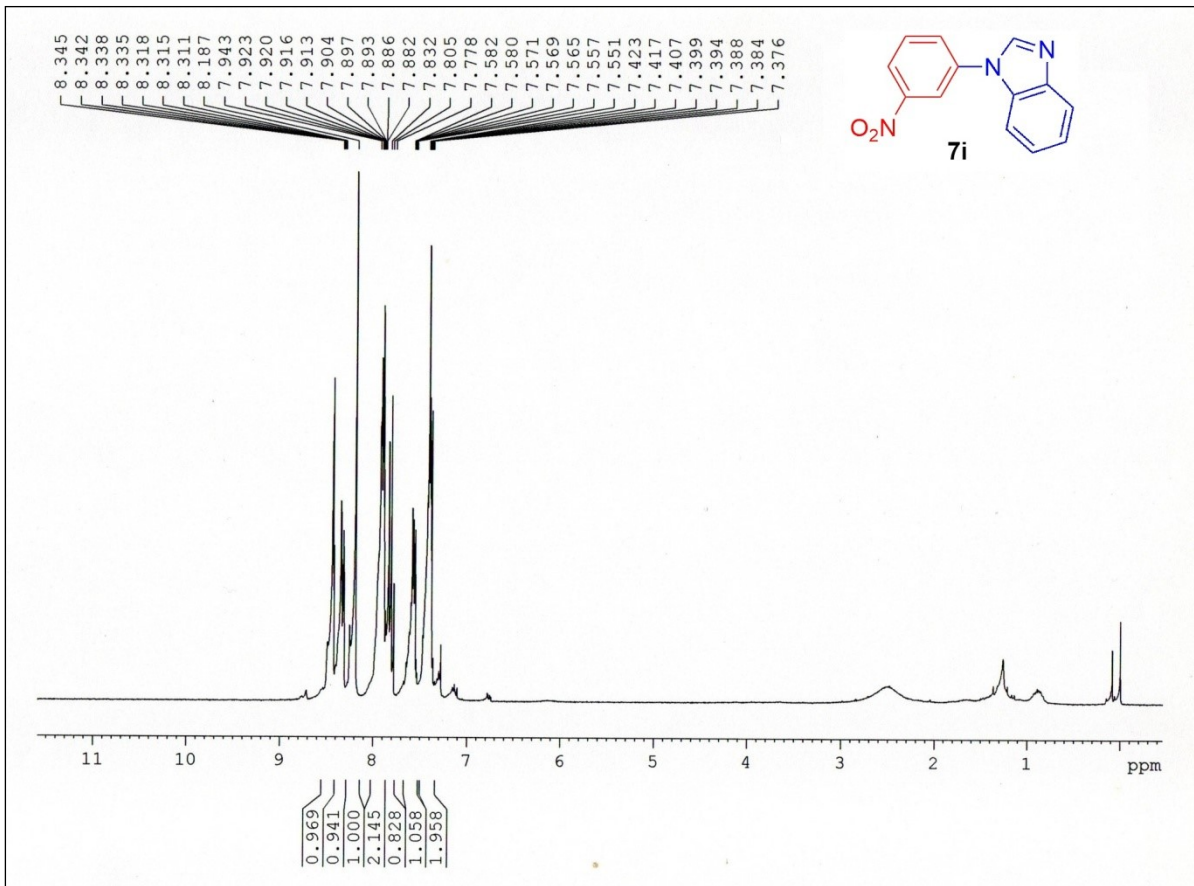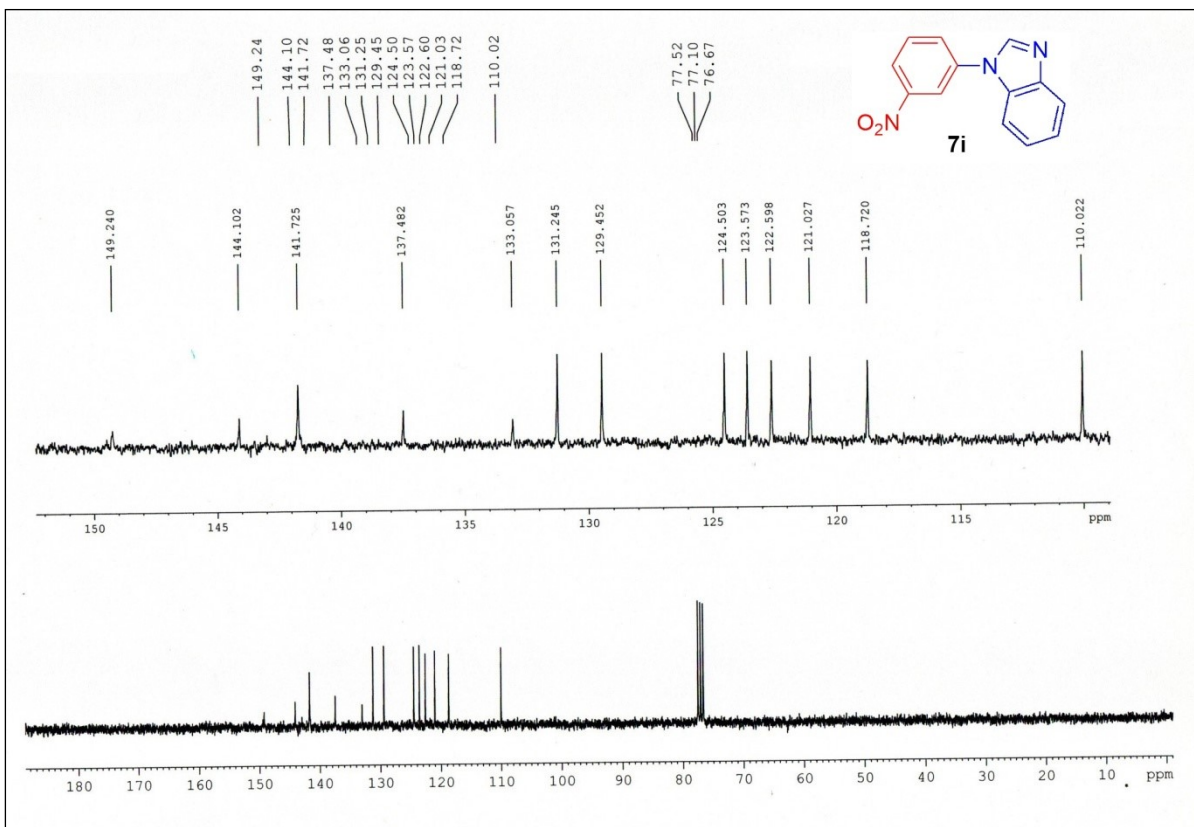

Supplement: d4nr01116c1.pdf [file d4nr01116c1.pdf]
